# Supplementary material for: Rhodium-catalyzed annulation between 2-arylimidazo[1,2-a]pyridines and alkynes leading to pyrido[1,2-a]benzimidazole derivatives
Source: Royal Society of Chemistry journal article supplement (doi:10.1039/c5ob00450k), 2015-01-01

# Supporting Information

## Rhodium-Catalyzed Annulation between 2-Arylimidazo[1,2-a]pyridines and Alkynes Leading to Pyrido[1,2-a]benzimidazole Derivatives

Haibo Peng, Jin-Tao Yu, Yan Jiang, Lei Wang and Jiang Cheng\*

<sup>a</sup> School of Petrochemical Engineering, Jiangsu Key Laboratory of Advanced Catalytic Materials & Technology, Jiangsu Province Key Laboratory of Fine Petrochemical Engineering, Changzhou University, Changzhou 213164, P. R. of China E-mail: [jiangcheng@cczu.edu.cn](mailto:jiangcheng@cczu.edu.cn)

### Table of Contents

|                                                                           |            |
|---------------------------------------------------------------------------|------------|
| <b>1 General experimental details</b> .....                               | <b>S2</b>  |
| <b>2. Mechanistic Experiments</b> .....                                   | <b>S2</b>  |
| <b>3 UV-Vis Absorption and Fluorescence</b> .....                         | <b>S6</b>  |
| <b>4 References</b> .....                                                 | <b>S7</b>  |
| <b>5 Characterization data for the products</b> .....                     | <b>S8</b>  |
| <b>6 Copies of <sup>1</sup>H NMR and <sup>13</sup>C NMR spectra</b> ..... | <b>S15</b> |

## 1 General experimental details

Chemicals were used as received without special purification unless stated otherwise.  $^1\text{H}$  and  $^{13}\text{C}$  NMR spectra were recorded at ambient temperature on a 300 or 400 MHz NMR spectrometer (75 or 100 MHz for  $^{13}\text{C}$  NMR). NMR results were reported in  $\delta$  units, parts per million (ppm), and were referenced to  $\text{CDCl}_3$  ( $\delta$  7.26 or 77.0 ppm) as the internal standard. The coupling constants  $J$  are given in Hz. Melting points were taken on an electrothermal melting point apparatus and without correction. IR spectra were recorded on a spectrometer using KBr discs.  $[\text{Cp}^*\text{Rh}(\text{MeCN})_3](\text{SbF}_6)_2$  was prepared according to literature procedure,<sup>1</sup> stored in a desiccator and weighed out to air.  $\text{D}_5$ -acetophenone was prepared through literature method.<sup>2</sup>

## 2. Mechanistic Experiments

### 2.1 The KIE studies on 2-phenylimidazo[1,2-a]pyridine

In a sealed tube, the mixture of **1a**/**D**<sub>5</sub>-**1a** (1: 1, 0.2 mmol), **2a** (0.24 mmol) was treated under standard conditions for 2 h. After that, the mixture was concentrated in vacuum and the residue was purified by flash column chromatography on silica gel with dichloromethane-ethyl acetate as eluent to give product **3aa** and **D**<sub>4</sub>-**3aa**. The mixture was analyzed using  $^1\text{H}$  NMR spectrometer. As shown in Figure S1, the ratio of **3aa** and **D**<sub>11</sub>-**3aa** is nearly 2.7.

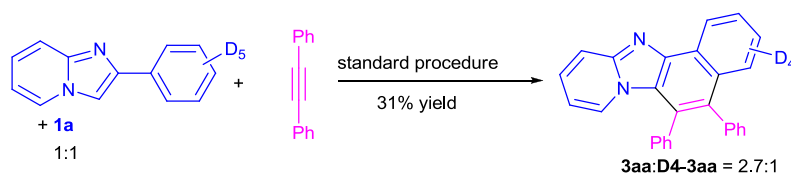

**Scheme S1** KIE experiment of **1a** and **D**<sub>4</sub>-**1a**.

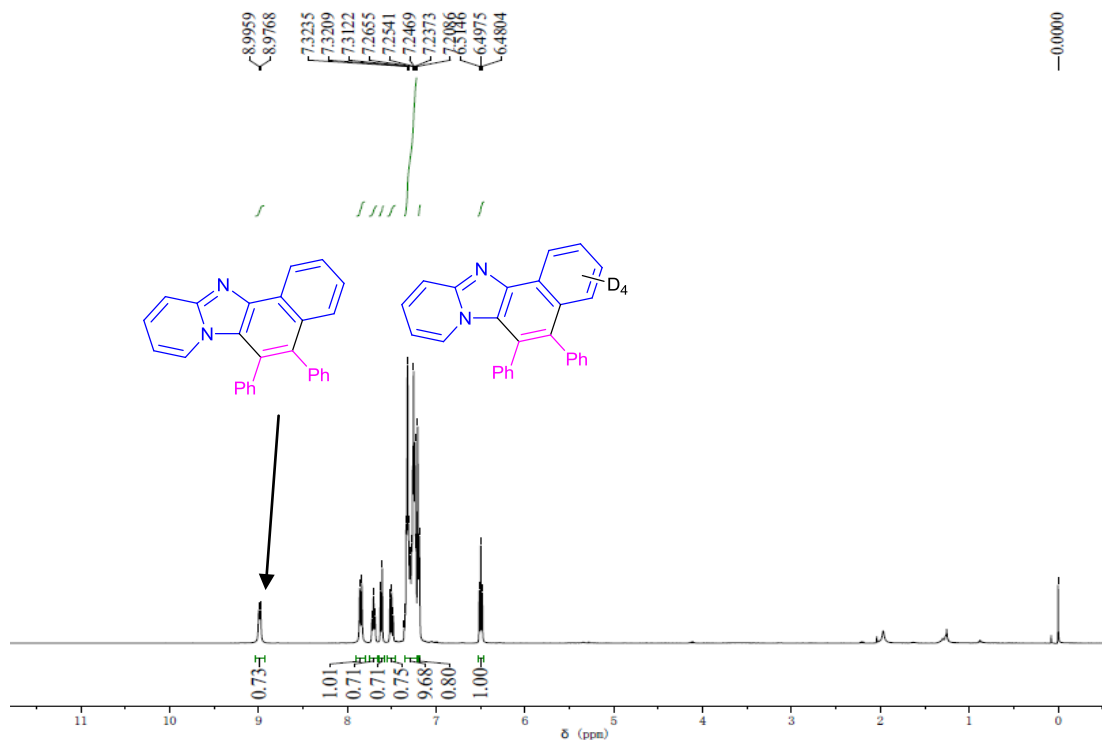

**Figure S1** The  $^1\text{H}$  NMR spectrum of the KIE results.

## 2.2 Deuterium kinetic isotope effect (DKIE) measurements.

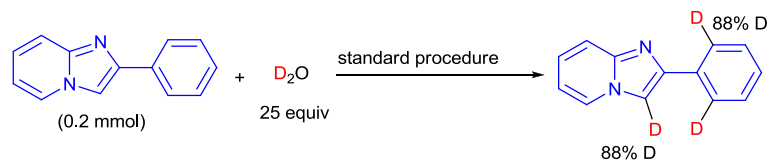

Under air, a sealed reaction tube was charged with **1a** (0.2 mmol),  $\text{D}_2\text{O}$  (25.0 equiv),  $[\text{Cp}^*\text{Rh}(\text{MeCN})_3](\text{SbF}_6)_2$  (2.5 mol %),  $\text{Cu}(\text{OAc})_2$  (1.2 equiv) and 1.5 mL of toluene. The reaction mixture was stirred at 110  $^\circ\text{C}$  for 12 h. After the completion of the reaction, the solvent was evaporated under reduced pressure and the residue was purified by flash column chromatography on a silica gel to give the product. The mixture was analyzed using  $^1\text{H}$  NMR spectrometer. The results are shown in Figure S2.

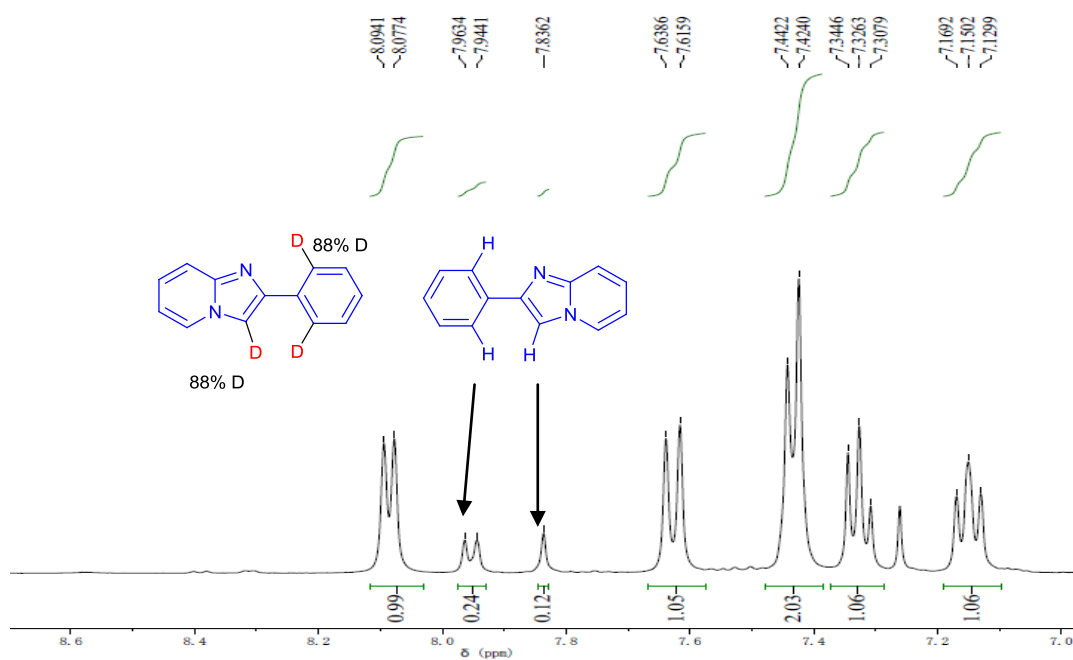

**Figure S2**

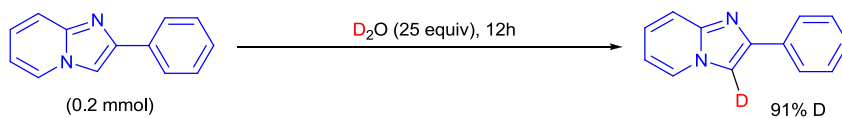

Under air, a sealed reaction tube was charged with **1a** (0.2 mmol), D<sub>2</sub>O (25.0 equiv) and 1.5 mL of toluene. The reaction mixture was stirred at 110 °C for 12 h. After the completion of the reaction, the solvent was evaporated under reduced pressure and the residue was purified by flash column chromatography on a silica gel to give the product. The mixture was analyzed using <sup>1</sup>H NMR spectrometer. The results are shown in Figure S3.

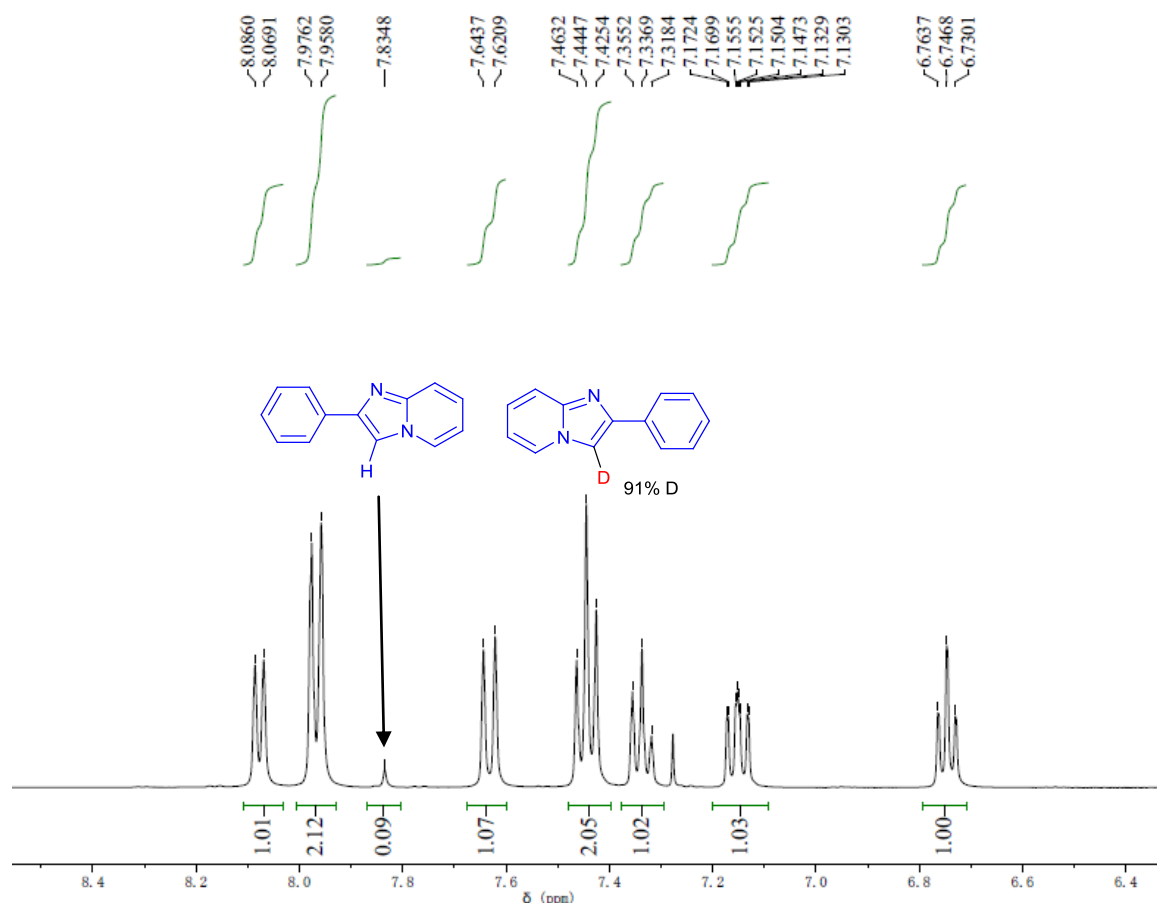

**Figure S3**

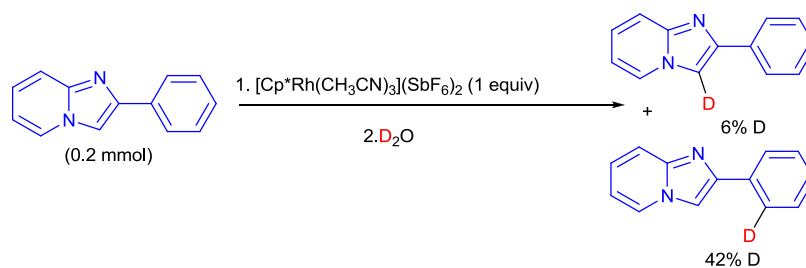

Under air, a sealed reaction tube was charged with **1a** (0.2 mmol),  $[\text{Cp}^*\text{Rh}(\text{MeCN})_3](\text{SbF}_6)_2$  (1equiv) and 1.5 mL of toluene. The reaction mixture was stirred at 110 °C for 12 h then quenched by  $\text{D}_2\text{O}$  (25.0 equiv). After the completion of the reaction, the solvent was evaporated under reduced pressure and the residue was purified by flash column chromatography on a silica gel to give the product. The mixture was analyzed using  $^1\text{H}$  NMR spectrometer. As shown in Figure S4.

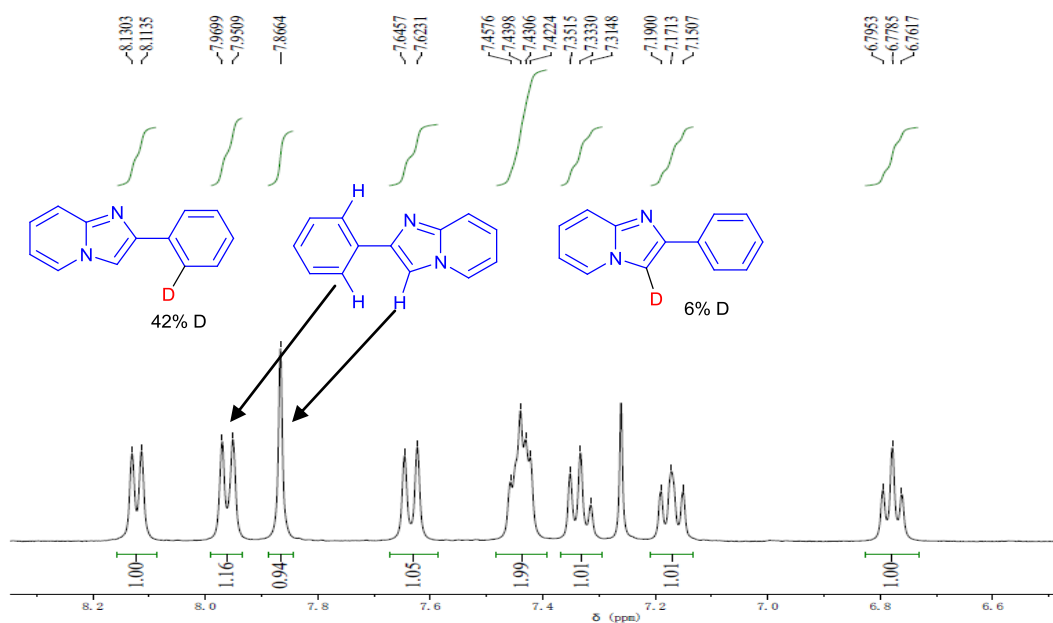

Figure S4

### 3 UV-Vis Absorption and Fluorescence

#### 3.1 UV-Vis Absorption Spectra of 3aa and 3ga.

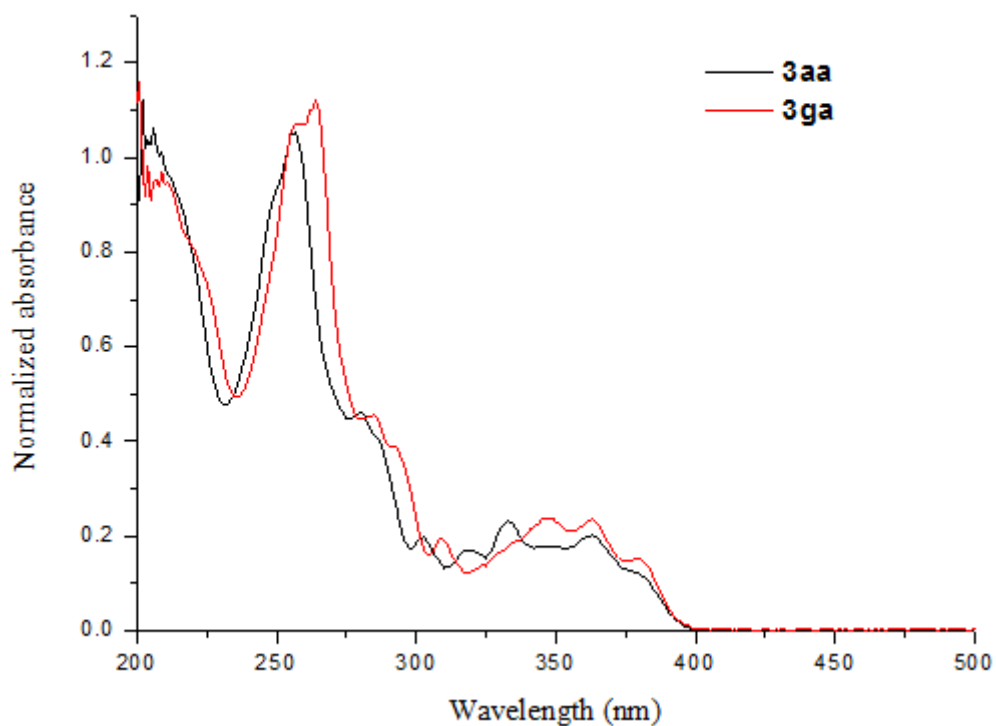

Figure S5 UV-vis absorption spectra of 3aa and 3ga in CH<sub>3</sub>OH.

#### 3.2 Fluorescence Spectra of 3aa and 3ga.

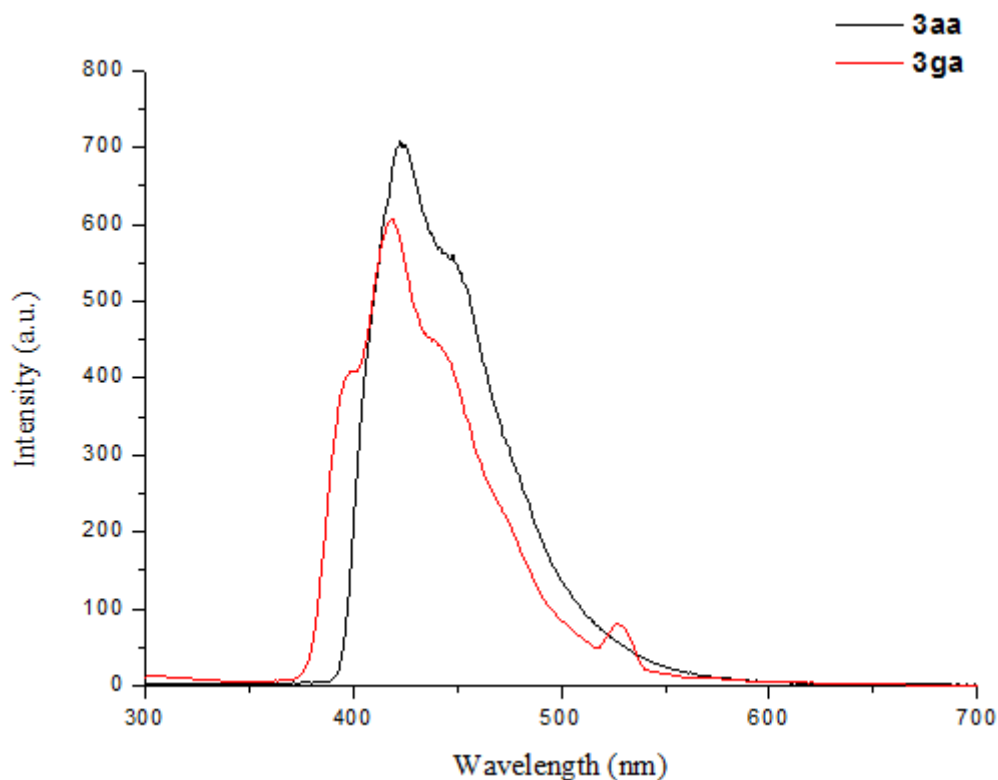

**Figure S6** Fluorescence spectra of **3aa** and **3ga** in CH<sub>3</sub>OH.

### 3.3 Photophysical Properties of **3aa** and **3ga**.

**Table S2.** Photophysical properties of **3aa** and **3ga** in CH<sub>3</sub>OH.

| Compound   | $\lambda_{\text{abs}}$ (nm)         | $\lambda_{\text{em}}$ (nm) | Stoke's shift (nm) |
|------------|-------------------------------------|----------------------------|--------------------|
| <b>3aa</b> | 202, 256, 280, 303<br>318, 333, 363 | 423                        | 60                 |
| <b>3ga</b> | 204, 262, 285, 309<br>336, 349, 379 | 419                        | 40                 |

## 4 References

- [1] Y. Li, B.-J. Li, W.-H. Wang, W.-P. Huang, X.-S. Zhang, K. Chen and Z.-J. Shi, *Angew. Chem., Int. Ed.*, 2011, **50**, 2115.
- [2] W. Zhang, S. Lou, Y. Liu and Z. Xu, *J. Org. Chem.*, 2013, **78**, 5932.

## 5 Characterization data for the products

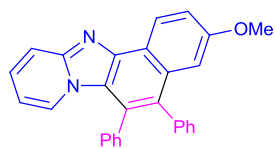

**(3ba)**: Flash column chromatography on a silica gel (ethyl acetate: dichloromethane, 1: 20) give the product (60.0 mg, 75% yield) as a yellow solid. Mp. 258-259 °C.  $^1\text{H}$  NMR ( $\text{CDCl}_3$ , 400 MHz):  $\delta$  8.88 (d,  $J = 8.9$  Hz, 2H), 7.81 (d,  $J = 9.1$  Hz, 1H), 7.37-7.18 (m, 13H), 6.96 (s, 1H), 6.48 (t,  $J = 6.8$  Hz, 1H), 3.71 (s, 3H);  $^{13}\text{C}$  NMR ( $\text{CDCl}_3$ , 100 MHz):  $\delta$  158.00, 148.01, 141.01, 138.60, 136.96, 132.85, 132.65, 131.46, 130.26, 128.42, 127.62, 127.57, 127.10, 127.06, 126.57, 126.57, 126.35, 124.50, 120.77, 117.51, 116.87, 110.42, 108.00, 55.11. MS (EI): 400 ( $\text{M}^+$ ); HRMS (ESI-TOF)  $m/z$  calcd for  $\text{C}_{28}\text{H}_{21}\text{N}_2\text{O}$  ( $\text{M}+\text{H}$ ) $^+$  401.1648, found 401.1646. IR (KBr)  $\nu$  3038, 1639, 1489, 1423  $\text{cm}^{-1}$ .

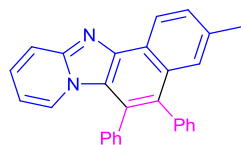

**(3ca)**: Flash column chromatography on a silica gel (ethyl acetate: dichloromethane 1: 20) give the product (61.4 mg, 80% yield) as a yellow solid. Mp. 257-258 °C.  $^1\text{H}$  NMR ( $\text{CDCl}_3$ , 400 MHz):  $\delta$  8.89 (s, 1H), 7.83 (d,  $J = 7.0$  Hz, 1H), 7.54 (s, 1H), 7.38 (s, 1H), 7.31-7.17 (m, 12H), 6.48 (t,  $J = 6.8$ , 1H), 2.44 (s, 3H);  $^{13}\text{C}$  NMR ( $\text{CDCl}_3$ , 100 MHz):  $\delta$  138.63, 137.00, 135.89, 134.48, 133.14, 131.57 (d), 130.34 (d), 128.40, 128.16 (d), 127.45, 127.11, 126.80, 126.63, 126.48, 124.43, 124.01, 122.79, 117.68, 110.52 (d), 22.02. MS (EI): 384 ( $\text{M}^+$ ); HRMS (ESI-TOF)  $m/z$  calcd for  $\text{C}_{28}\text{H}_{21}\text{N}_2$  ( $\text{M}+\text{H}$ ) $^+$  385.1699, found 385.1698. IR (KBr)  $\nu$  3053, 1627, 1491, 1441, 1352  $\text{cm}^{-1}$ .

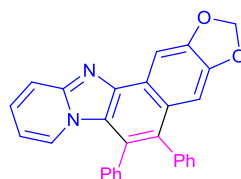

**(3da)**: Flash column chromatography on a silica gel (ethyl acetate: dichloromethane, 1: 15) give the product (57.1 mg, 69% yield) as a greenish solid. Mp. 241-242 °C.  $^1\text{H}$  NMR ( $\text{CDCl}_3$ , 400 MHz):  $\delta$  8.59 (d,  $J = 8.3$  Hz, 1H), 7.80 (d,  $J = 8.8$  Hz, 1H), 7.38-7.14 (m, 13H), 6.49 (t,  $J = 6.5$  Hz, 1H), 5.77 (s, 2H);  $^{13}\text{C}$  NMR ( $\text{CDCl}_3$ , 100 MHz):  $\delta$  145.34, 142.93, 139.35, 136.45, 131.08, 130.40 (d), 129.15, 128.40, 127.83, 127.68, 127.21, 126.52 (d), 126.33 (d), 126.20, 122.38, 117.86, 117.57, 117.07, 110.71, 110.09, 100.66. MS (EI): 414 ( $\text{M}^+$ ); HRMS (ESI-TOF)  $m/z$  calcd for  $\text{C}_{28}\text{H}_{19}\text{N}_2\text{O}_2$  ( $\text{M}+\text{H}$ ) $^+$  415.1441, found 415.1441. IR (KBr)  $\nu$  2924, 1636, 1497, 1431, 1352  $\text{cm}^{-1}$ .



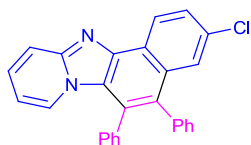

**(3ea):** Flash column chromatography on a silica gel (ethyl acetate: dichloromethane, 1: 20) give the product (50.1 mg, 62% yield) as a yellow solid. Mp. 299-301 °C.  $^1\text{H}$  NMR ( $\text{CDCl}_3$ , 400 MHz):  $\delta$  8.91 (s, 1H), 7.84 (d,  $J = 7.7$  Hz, 1H), 7.66 (s, 1H), 7.58 (s, 1H), 7.33-7.16 (m, 12H), 6.53 (t,  $J = 6.7$  Hz, 1H);  $^{13}\text{C}$  NMR ( $\text{CDCl}_3$ , 100 MHz):  $\delta$  137.79, 136.55, 132.66, 132.40, 132.19, 131.49(d), 130.18 (d), 128.57 (d), 127.95, 127.93, 127.88, 127.72, 127.61, 126.90 (d), 126.83, 126.55, 124.59, 117.85, 110.85. MS (EI): 404 ( $\text{M}^+$ ); HRMS (ESI-TOF)  $m/z$  calcd for  $\text{C}_{27}\text{H}_{18}\text{ClN}_2$  ( $\text{M}+\text{H}$ ) $^+$  405.1153, found 405.1152. IR (KBr)  $\nu$  2922, 1636, 1489, 1433  $\text{cm}^{-1}$ .

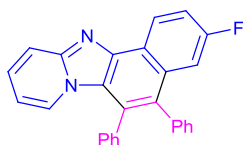

**(3fa):** Flash column chromatography on a silica gel (ethyl acetate: dichloromethane, 1: 20) give the product (54.3 mg, 70% yield) as a yellow solid. Mp. 238-240 °C.  $^1\text{H}$  NMR ( $\text{CDCl}_3$ , 400 MHz):  $\delta$  8.97 (s, 1H), 7.82 (s, 1H), 7.45 (s, 1H), 7.34-7.16 (m, 13H), 6.50 (t,  $J = 6.8$ , 1H);  $^{13}\text{C}$  NMR ( $\text{CDCl}_3$ , 100 MHz):  $\delta$  162.4 (d,  $J_{\text{C-F}} = 242.6$  Hz), 138.0, 136.6, 132.8 (d,  $J_{\text{C-F}} = 5.12$  Hz), 131.4 (d), 130.2 (d), 128.5 (d), 127.8, 128.7 (d), 127.4, 127.3, 126.8, 126.5 (d,  $J_{\text{C-F}} = 1.7$  Hz), 125.2 (d,  $J_{\text{C-F}} = 8.5$  Hz), 122.8, 117.8, 115.65 (d,  $J_{\text{C-F}} = 24.5$  Hz), 111.7 (d,  $J_{\text{C-F}} = 22.4$  Hz), 110.7. MS (EI): 388 ( $\text{M}^+$ ); HRMS (ESI-TOF)  $m/z$  calcd for  $\text{C}_{27}\text{H}_{18}\text{FN}_2$  ( $\text{M}+\text{H}$ ) $^+$  389.1449, found 389.1447. IR (KBr)  $\nu$  3055, 1628, 1491, 1439, 1350  $\text{cm}^{-1}$ .

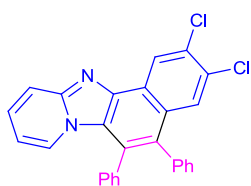

**(3ga):** Flash column chromatography on a silica gel (ethyl acetate: dichloromethane, 1: 20) give the product (58.7 mg, 67% yield) as a yellow solid. Mp. 323-325 °C.  $^1\text{H}$  NMR ( $\text{CDCl}_3$ , 400 MHz):  $\delta$  9.04 (s, 1H), 7.84 (d,  $J = 9.1$  Hz, 1H), 7.67 (s, 1H), 7.36-7.33 (m, 4H), 7.30-7.22 (m, 6H), 7.17-7.15 (m, 2H), 6.54 (t,  $J = 6.7$ , 1H);  $^{13}\text{C}$  NMR ( $\text{CDCl}_3$ , 100 MHz):  $\delta$  148.37, 139.74, 137.45, 136.25, 132.34, 131.42, 130.68, 130.64, 130.40 (d), 130.13, 128.77, 128.63(d), 128.01, 127.90, 127.80, 126.48, 125.10, 124.34, 123.21, 117.91, 111.09. MS (EI): 438 ( $\text{M}^+$ ); HRMS (ESI-TOF)  $m/z$  calcd for  $\text{C}_{27}\text{H}_{17}\text{Cl}_2\text{N}_2$  ( $\text{M}+\text{H}$ ) $^+$  439.0763, found 439.0762. IR (KBr)  $\nu$  3053, 1637, 1491, 1431, 1352, 1265, 1119  $\text{cm}^{-1}$ .

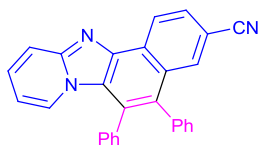

**(3ha):** Flash column chromatography on a silica gel (ethyl acetate: dichloromethane, 1: 20) give the product (49.8 mg, 63% yield) as a yellow solid. Mp. 269-270 °C.  $^1\text{H}$  NMR ( $\text{CDCl}_3$ , 400 MHz):  $\delta$  9.00 (d,  $J$  = 8.4 Hz, 1H), 7.99 (t,  $J$  = 8.3, 1H), 7.86-7.79 (m, 2H), 7.38-7.15 (m, 12H), 6.56 (t,  $J$  = 6.9, 1H);  $^{13}\text{C}$  NMR ( $\text{CDCl}_3$ , 100 MHz):  $\delta$  148.50, 136.99, 135.91, 133.38, 133.26, 132.38, 131.32, 130.56, 129.96, 128.65, 128.47, 128.15, 128.10, 127.83, 127.76, 127.22, 126.82, 126.48, 126.18, 124.03, 119.59, 117.95, 112.23, 109.19. MS (EI): 395 ( $\text{M}^+$ ); HRMS (ESI-TOF)  $m/z$  calcd for  $\text{C}_{28}\text{H}_{18}\text{N}_3$  ( $\text{M}+\text{H}$ ) $^+$  396.1495, found 396.1492. IR (KBr)  $\nu$  3055, 2222, 1637, 1502, 1489, 1441, 1356  $\text{cm}^{-1}$ .

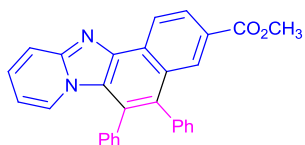

**(3ia):** Flash column chromatography on a silica gel (ethyl acetate: dichloromethane, 1: 15) give the product (62.5 mg, 73% yield) as a yellow solid. Mp. 229-230 °C.  $^1\text{H}$  NMR ( $\text{CDCl}_3$ , 400 MHz):  $\delta$  9.02 (d,  $J$  = 8.5 Hz, 1H), 8.40 (s, 1H), 8.31 (t,  $J$  = 8.4 Hz, 1H), 8.12-8.00 (m, 1H), 7.92-7.85 (m, 1H), 7.34-7.26 (m, 9H), 7.20 (d,  $J$  = 7.4 Hz, 2H), 6.54 (t,  $J$  = 6.9 Hz, 1H), 3.88 (s, 3H);  $^{13}\text{C}$  NMR ( $\text{CDCl}_3$ , 100 MHz):  $\delta$  167.41, 140.41, 137.71, 136.50, 134.47, 131.53, 130.71, 130.33, 130.25, 130.07, 128.58, 127.90, 127.66, 127.60, 127.53, 126.93, 126.54, 125.89, 125.74, 123.21, 118.00, 117.72, 112.76, 110.97, 52.13. MS (EI): 428 ( $\text{M}^+$ ); HRMS (ESI-TOF)  $m/z$  calcd for  $\text{C}_{29}\text{H}_{21}\text{N}_2\text{O}_2$  ( $\text{M}+\text{H}$ ) $^+$  429.1598, found 429.1595. IR (KBr)  $\nu$  2950, 2928, 1711, 1637, 1504, 1433, 1356  $\text{cm}^{-1}$ .

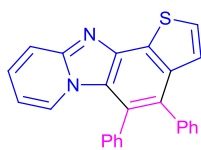

**(3ja):** Flash column chromatography on a silica gel (ethyl acetate: dichloromethane, 1: 15) give the product (56.4 mg, 75% yield) as a orange solid. Mp. 237-238 °C.  $^1\text{H}$  NMR ( $\text{CDCl}_3$ , 400 MHz):  $\delta$  7.80-7.78 (m, 1H), 7.48-7.47 (m, 1H), 7.35-7.16 (m, 13H), 6.49 (t,  $J$  = 6.8, 1H);  $^{13}\text{C}$  NMR ( $\text{CDCl}_3$ , 100 MHz):  $\delta$  139.00, 138.16, 136.46, 130.98 (d), 130.75 (d), 128.87, 128.52, 128.11, 127.79 (d), 127.52 (d), 126.99, 126.56, 125.37, 125.29, 124.33, 117.75, 110.36. MS (EI): 376 ( $\text{M}^+$ ); HRMS (ESI-TOF)  $m/z$  calcd for  $\text{C}_{25}\text{H}_{17}\text{N}_2\text{S}$  ( $\text{M}+\text{H}$ ) $^+$  377.1107, found 377.1105. IR (KBr)  $\nu$  3043, 1637, 1501, 1413, 1348  $\text{cm}^{-1}$ .

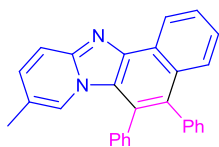

**(3ka):** Flash column chromatography on a silica gel (ethyl acetate: dichloromethane, 1: 15) give the product (62.2 mg, 81% yield) as a yellow solid. Mp. 285-286 °C. <sup>1</sup>H NMR (CDCl<sub>3</sub>, 400 MHz): δ 8.95 (d, *J* = 8.1, 1H), 7.74-7.72 (m, 1H), 7.68 (t, *J* = 7.4 Hz, 1H), 7.61 (d, *J* = 8.4 Hz, 1H), 7.48 (t, *J* = 7.6 Hz, 1H), 7.25-7.13 (m, 11H), 6.95 (s, 1H), 2.02 (m, 3H); <sup>13</sup>C NMR (CDCl<sub>3</sub>, 100 MHz): δ 147.11, 140.83, 138.63, 137.00, 133.07, 131.57, 131.26, 130.36, 130.31, 128.34, 127.54, 127.51, 127.46, 126.66, 126.51, 126.09, 126.03, 125.95, 124.17, 122.81, 122.49, 119.85, 116.99, 18.39. MS (EI): 384 (M<sup>+</sup>); HRMS (ESI-TOF) *m/z* calcd for C<sub>28</sub>H<sub>21</sub>N<sub>2</sub> (M+H)<sup>+</sup> 385.1699, found 395.1698. IR (KBr) ν 3026, 1647, 1572, 1492, 1408 cm<sup>-1</sup>.

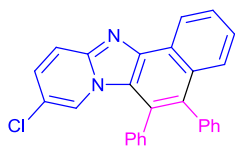

**(3la):** Flash column chromatography on a silica gel (ethyl acetate: dichloromethane, 1: 15) give the product (63.0 mg, 78% yield) as a yellow solid. Mp. 210-211 °C. <sup>1</sup>H NMR (CDCl<sub>3</sub>, 400 MHz): δ 8.94 (t, *J* = 8.0 Hz, 1H), 8.09 (s, 1H), 7.90 (d, *J* = 7.5 Hz, 2H), 7.78-7.70 (m, 2H), 7.62 (d, *J* = 8.3 Hz, 1H), 7.56-7.49 (m, 2H), 7.43 (t, *J* = 7.3 Hz, 1H), 7.37-7.33 (m, 3H), 7.28-7.24 (m, 3H), 7.19-7.17 (m, 1H), 7.11-7.09 (m, 1H); <sup>13</sup>C NMR (CDCl<sub>3</sub>, 100 MHz): δ 146.05, 138.23, 136.19, 134.21, 131.43, 130.18, 128.72, 128.64, 128.33, 128.21, 127.97, 127.67, 127.55, 126.71, 126.44, 125.97, 124.37, 123.31, 122.86, 120.44, 118.43, 117.99, 117.75. MS (EI): 404 (M<sup>+</sup>); HRMS (ESI-TOF) *m/z* calcd for C<sub>27</sub>H<sub>18</sub>ClN<sub>2</sub> (M+H)<sup>+</sup> 405.1153, found 405.1151. IR (KBr) ν 3024, 1568, 1520, 1493, 1408, 1321 cm<sup>-1</sup>.

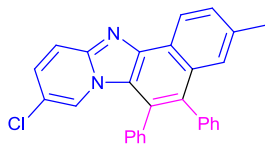

**(3ma):** Flash column chromatography on a silica gel (ethyl acetate: dichloromethane, 1: 20) give the product (63.5 mg, 76% yield) as a yellow solid. Mp. 255-256 °C. <sup>1</sup>H NMR (CDCl<sub>3</sub>, 400 MHz): δ 8.83 (d, *J* = 8.2 Hz, 1H), 7.80-7.74 (m, 1H), 7.56 (d, *J* = 8.2 Hz, 1H), 7.38-7.36 (m, 3H), 7.29-7.24 (m, 10H), 2.45 (s, 3H); <sup>13</sup>C NMR (CDCl<sub>3</sub>, 100 MHz): δ 146.07, 138.38, 136.35, 136.30, 133.86, 131.74, 131.49, 130.22, 129.44, 128.63, 128.45, 128.22, 127.92, 127.56, 126.95, 126.66, 126.39, 124.36, 124.00, 122.80, 122.33, 118.33, 117.94, 22.06. MS (EI): 418 (M<sup>+</sup>); HRMS (ESI-TOF) *m/z* calcd for C<sub>28</sub>H<sub>20</sub>ClN<sub>2</sub> (M+H)<sup>+</sup> 419.1310, found 419.1307. IR (KBr) ν 3051, 2359, 1601, 1491, 1418, 1323 cm<sup>-1</sup>.

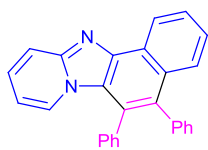

**(3aa):** Flash column chromatography on a silica gel (ethyl acetate: dichloromethane, 1: 20) give the product (61.4 mg, 83% yield) as a yellow solid. Mp. 237-238 °C. <sup>1</sup>H NMR (CDCl<sub>3</sub>, 400 MHz): δ 8.98 (d, *J* = 7.2 Hz, 1H), 7.80 (d, *J* = 8.4 Hz, 1H), 7.71 (s, 1H), 7.61 (d, *J* = 7.8 Hz, 1H), 7.51 (d, *J* = 6.8 Hz, 1H), 7.26 (m, 12H), 6.49 (s, 1H); <sup>13</sup>C NMR (CDCl<sub>3</sub>, 100 MHz): δ 148.01, 140.88, 140.44, 138.57, 136.91, 131.57, 131.43, 130.36, 128.47, 127.69, 127.57, 127.49, 127.18, 126.59, 126.57, 126.45, 126.16, 126.15, 126.01, 122.94, 122.62, 117.83, 110.58. MS (EI): 371 (M<sup>+</sup>); HRMS (ESI-TOF) m/z calcd for C<sub>27</sub>H<sub>19</sub>N<sub>2</sub> (M+H)<sup>+</sup> 371.1543, found 371.1542. IR (KBr) ν 3055, 1626, 1493, 1423, 1352 cm<sup>-1</sup>.

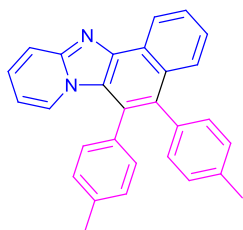

**(3ab):** Flash column chromatography on a silica gel (ethyl acetate: dichloromethane, 1: 20) give the product (63.7 mg, 80% yield) as a yellow solid. Mp. 249-250 °C. <sup>1</sup>H NMR (CDCl<sub>3</sub>, 400 MHz): δ 8.96 (d, *J* = 8.1 Hz, 1H), 7.85 (d, *J* = 9.1 Hz, 1H), 7.69 (t, *J* = 7.4 Hz, 1H), 7.61 (d, *J* = 8.5 Hz, 1H), 7.50-7.41 (m, 1H), 7.31 (t, *J* = 7.3 Hz, 2H), 7.14 (s, 4H), 7.07 (s, 4H), 6.51 (t, *J* = 6.9 Hz, 1H), 2.38 (s, 3H), 2.33 (s, 3H); <sup>13</sup>C NMR (CDCl<sub>3</sub>, 75 MHz): δ 147.86, 140.57, 137.21, 135.92, 135.55, 133.84, 133.67, 131.70, 131.36, 130.11, 129.22, 128.69, 128.24, 127.62, 127.18, 126.66, 126.58, 126.04, 126.00, 125.91, 122.88, 117.69, 110.54, 21.37, 21.24. MS (EI): 398 (M<sup>+</sup>); HRMS (ESI-TOF) m/z calcd for C<sub>29</sub>H<sub>23</sub>N<sub>2</sub> (M+H)<sup>+</sup> 399.1856, found 399.1856. IR (KBr) ν 3051, 2920, 1634, 1506, 1421, 1358 cm<sup>-1</sup>.

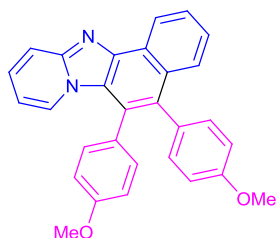

**(3ac):** Flash column chromatography on a silica gel (ethyl acetate: dichloromethane, 1: 15) give the product (66.2 mg, 77% yield) as a yellow solid. Mp. 248-250 °C. <sup>1</sup>H NMR (CDCl<sub>3</sub>, 400 MHz): δ 8.96 (d, *J* = 8.0, 1H), 7.85 (d, *J* = 8.2 Hz, 1H), 7.69 (t, *J* = 7.1 Hz, 1H), 7.64 (d, *J* = 8.3, 1H), 7.50 (t, *J* = 7.3 Hz, 1H), 7.38 (d, *J* = 7.0 Hz, 1H), 7.34-7.30 (m, 1H), 7.15 (d, *J* = 8.6 Hz, 2H), 7.10 (d, *J* = 8.5 Hz, 2H), 6.88 (d, *J* = 8.6 Hz, 2H), 6.81 (d, *J* = 8.5 Hz, 2H), 6.53 (t, *J* = 6.6 Hz, 1H) 3.85 (s, 1H), 3.81 (s, 3H); <sup>13</sup>C NMR (CDCl<sub>3</sub>, 100 MHz): δ 158.80, 158.08, 147.93, 140.71, 133.67, 132.54, 131.88, 131.41, 130.96, 129.24, 129.19, 127.60, 127.17, 126.60, 126.57, 126.08, 126.02, 122.93, 117.79, 116.30, 113.93, 113.03, 110.59, 55.18,

55.13. MS (EI): 430 ( $M^+$ ); HRMS (ESI-TOF)  $m/z$  calcd for  $C_{29}H_{23}N_2O_2$  ( $M+H$ )<sup>+</sup> 431.1754, found 431.1752. IR (KBr)  $\nu$  3031, 1609, 1506, 1456, 1421, 1354, 1288  $cm^{-1}$ .

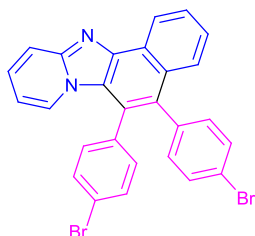

**(3ad):** Flash column chromatography on a silica gel (ethyl acetate: dichloromethane, 1: 20) give the product (46.2 mg, 44% yield) as a yellow solid. Mp. 294-295 °C. <sup>1</sup>H NMR ( $CDCl_3$ , 300 MHz):  $\delta$  8.96 (d,  $J$  = 8.2 Hz, 1H), 7.85 (d,  $J$  = 9.0 Hz, 1H), 7.74-7.70 (m, 1H) 7.55-7.48 (m, 4H), 7.46-7.41 (m, 2H), 7.37-7.34 (m, 2H), 7.14 (d,  $J$  = 8.2 Hz, 2H), 7.04 (d,  $J$  = 8.2 Hz, 2H), 6.59 (t,  $J$  = 6.8 Hz, 1H); <sup>13</sup>C NMR ( $CDCl_3$ , 100 MHz):  $\delta$  148.12, 141.15, 137.28, 135.56, 133.09, 132.94, 132.16, 131.95, 131.90, 131.63, 130.98, 127.52, 127.22, 126.54, 126.46, 126.13, 125.25, 123.04, 122.24, 122.11, 121.10, 117.99, 111.04. MS (EI): 525 ( $M^+$ ); HRMS (ESI-TOF)  $m/z$  calcd for  $C_{27}H_{17}Br_2N_2$  ( $M+H$ )<sup>+</sup> 526.9753, found 526.9751. IR (KBr)  $\nu$  3055, 1622, 1491, 1467, 1352, 1275  $cm^{-1}$ .

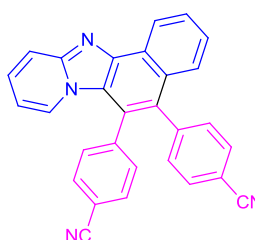

**(3ae):** Flash column chromatography on a silica gel (ethyl acetate: dichloromethane, 1: 15) give the product (43.7 mg, 52% yield) as a yellow solid. Mp. 167-168 °C. <sup>1</sup>H NMR ( $CDCl_3$ , 400 MHz):  $\delta$  9.00 (d,  $J$  = 8.1 Hz, 1H), 7.89 (d,  $J$  = 9.1 Hz, 1H), 7.78 (d,  $J$  = 7.3 Hz, 1H), 7.69 (d,  $J$  = 8.1 Hz, 2H), 7.61-7.54 (m, 3H), 7.46-7.38 (m, 4H), 7.30 (d,  $J$  = 8.0 Hz, 2H), 7.24 (d,  $J$  = 7.1 Hz, 1H), 6.63 (t,  $J$  = 6.8 Hz, 1H); <sup>13</sup>C NMR ( $CDCl_3$ , 75 MHz):  $\delta$  148.37, 143.30, 141.65, 141.37, 132.52, 132.26, 131.69, 131.28, 131.18, 130.31, 127.93, 127.11, 126.94, 126.83, 126.38, 125.69, 124.57, 123.29, 121.45, 118.50, 118.29, 118.06, 112.44, 111.49, 111.24. MS (EI): 420 ( $M^+$ ); HRMS (ESI-TOF)  $m/z$  calcd for  $C_{29}H_{17}N_4$  ( $M+H$ )<sup>+</sup> 421.1448, found 421.1446. IR (KBr)  $\nu$  3360, 2922, 2230, 1637, 1502, 1425, 1354  $cm^{-1}$ .

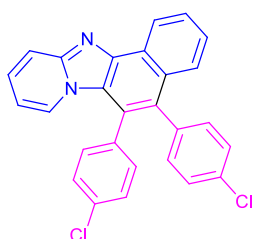

**(3af):** Flash column chromatography on a silica gel (ethyl acetate: dichloromethane, 1: 20) give the product (56.1 mg, 64% yield) as a yellow solid. Mp. 233-235 °C. <sup>1</sup>H NMR ( $CDCl_3$ , 400 MHz):  $\delta$  8.97 (d,  $J$  = 8.2 Hz, 1H), 7.87-7.85 (m, 1H), 7.74-7.70 (m, 1H), 7.56-7.50 (m, 2H),

7.37-7.33 (m, 4H), 7.28-7.26 (m, 2H), 7.20-7.18 (m, 2H), 7.12 (d,  $J = 8.3$  Hz, 2H), 6.59 (t,  $J = 6.7$  Hz, 1H);  $^{13}\text{C}$  NMR ( $\text{CDCl}_3$ , 100 MHz):  $\delta$  148.16, 136.85, 135.17, 134.03, 132.88, 132.77, 131.65, 131.13, 129.01(d), 128.04, 127.48, 127.25, 126.54, 126.54, 126.46, 126.22, 126.16, 125.39, 123.08, 122.23, 118.04, 110.99. MS (EI): 438 ( $\text{M}^+$ ); HRMS (ESI-TOF)  $m/z$  calcd for  $\text{C}_{27}\text{H}_{17}\text{Cl}_2\text{N}_2^+$  ( $\text{M}+\text{H}$ ) $^+$  439.0763, found 439.0760. IR (KBr)  $\nu$  3061, 1636, 1493, 1425, 1354, 1261, 1092  $\text{cm}^{-1}$ .

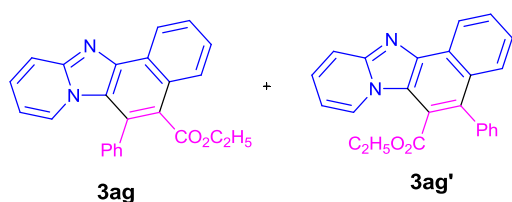

**(3ag + 3ag')**: Flash column chromatography on a silica gel (ethyl acetate: dichloromethane, 1: 15) give the product (**3ag + 3ag'** = 58.6 mg, 80% yield) as a yellow solid. Mp. 168-170 °C.  $^1\text{H}$

NMR ( $\text{CDCl}_3$ , 400 MHz):  $\delta$  8.94 (s, 2H), 8.54 (d,  $J = 6.5$  Hz, 2H), 8.08 (d,  $J = 8.2$  Hz, 1H), 7.90-7.87 (m, 2H), 7.73-7.65 (m, 4H), 7.55-7.40 (m, 11H), 7.34-7.31 (m, 1H), 6.89 (t,  $J = 6.8$  Hz, 1H), 6.53 (t,  $J = 6.8$  Hz, 1H), 4.15-4.10 (m, 1H), 0.98 (t,  $J = 7.1$  Hz, 2H), 0.93 (t,  $J = 7.2$  Hz, 3H);  $^{13}\text{C}$  NMR ( $\text{CDCl}_3$ , 100 MHz):  $\delta$  168.74, 168.04, 138.10, 135.60, 133.29, 130.69, 130.47, 129.61, 128.82, 128.76, 128.17, 128.03, 127.95, 127.76, 127.65, 127.33, 127.10, 127.06, 126.64, 126.42, 126.32, 126.28, 125.92, 125.88, 125.56, 123.17, 123.01, 117.91, 117.84, 61.76, 61.12, 13.68, 13.41. MS (EI): 366 ( $\text{M}^+$ ); HRMS (ESI-TOF)  $m/z$  calcd for  $\text{C}_{24}\text{H}_{19}\text{N}_2\text{O}_2$  ( $\text{M}+\text{H}$ ) $^+$  367.1441, found 367.1441. IR (KBr)  $\nu$  3057, 1709, 1637, 1495, 1425, 1354  $\text{cm}^{-1}$ .

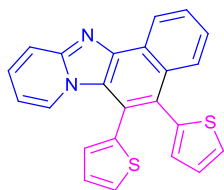

**(3ah)**: Flash column chromatography on a silica gel (ethyl acetate: dichloromethane, 1: 20) give the product (45.8 mg, 60% yield) as a brownish solid. Mp. 224-225 °C.  $^1\text{H}$  NMR ( $\text{CDCl}_3$ , 400 MHz):  $\delta$  8.93 (d,  $J = 8.1$  Hz, 1H), 7.85 (t,  $J = 8.6$  Hz, 2H), 7.73 (t,  $J = 7.3$  Hz, 1H), 7.57 (t,  $J = 7.6$  Hz, 1H), 7.45-7.35 (m, 4H), 7.12-6.98 (m, 4H), 6.63 (t,  $J = 6.8$  Hz, 1H);  $^{13}\text{C}$  NMR ( $\text{CDCl}_3$ , 100 MHz):  $\delta$  148.33, 141.54, 138.64, 136.77, 132.10, 129.91, 129.11, 127.98, 127.77, 127.57, 127.38, 127.28, 126.86, 126.56, 126.48, 126.39, 126.32, 126.29, 123.09, 122.92, 121.01, 117.80, 111.07. MS (EI): 382 ( $\text{M}^+$ ); HRMS (ESI-TOF)  $m/z$  calcd for  $\text{C}_{23}\text{H}_{15}\text{N}_2\text{S}_2$  ( $\text{M}+\text{H}$ ) $^+$  383.0671, found 383.0669. IR (KBr)  $\nu$  3067, 2922, 1636, 1495, 1425  $\text{cm}^{-1}$ .

# 6 Copies of $^1\text{H}$ NMR and $^{13}\text{C}$ NMR spectra

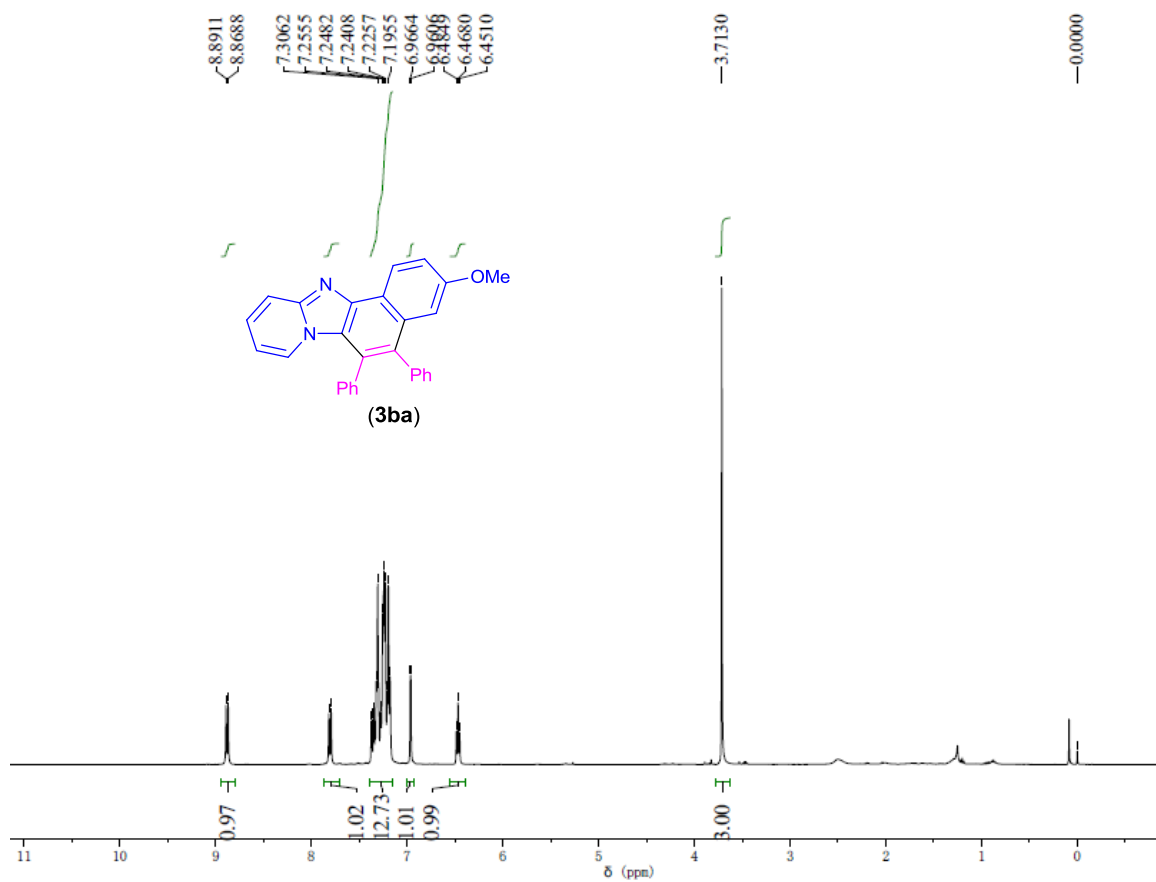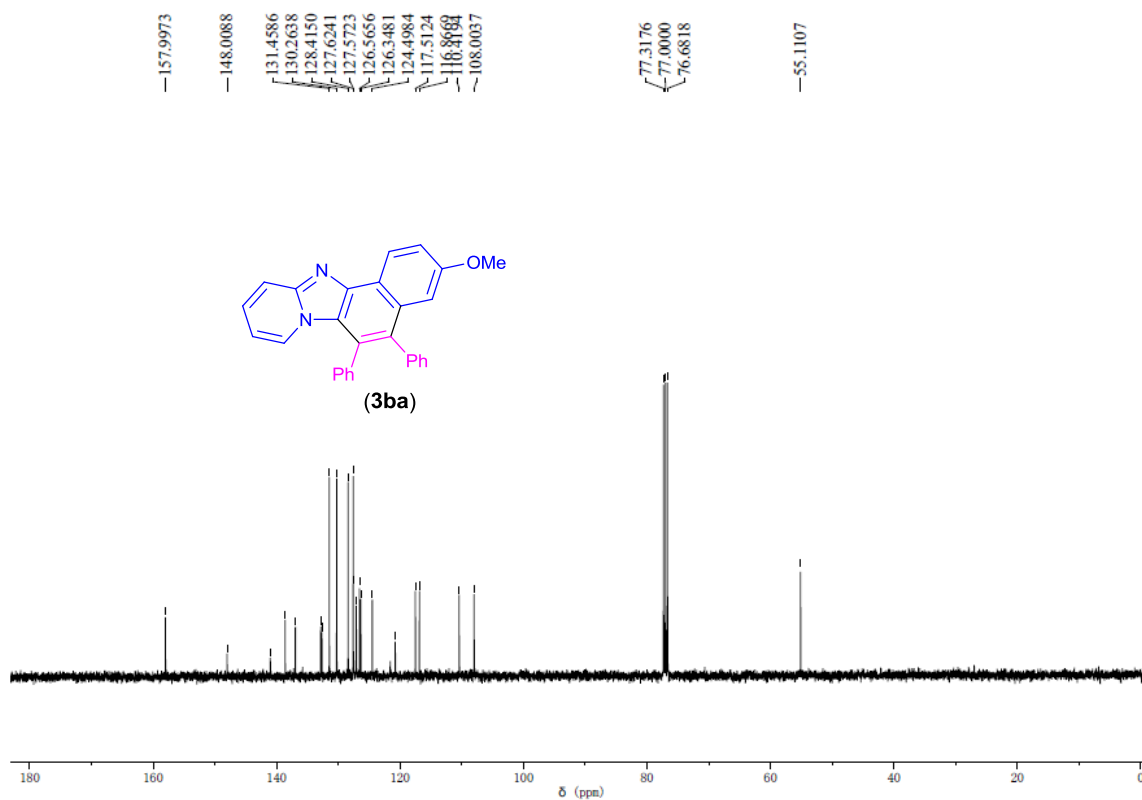

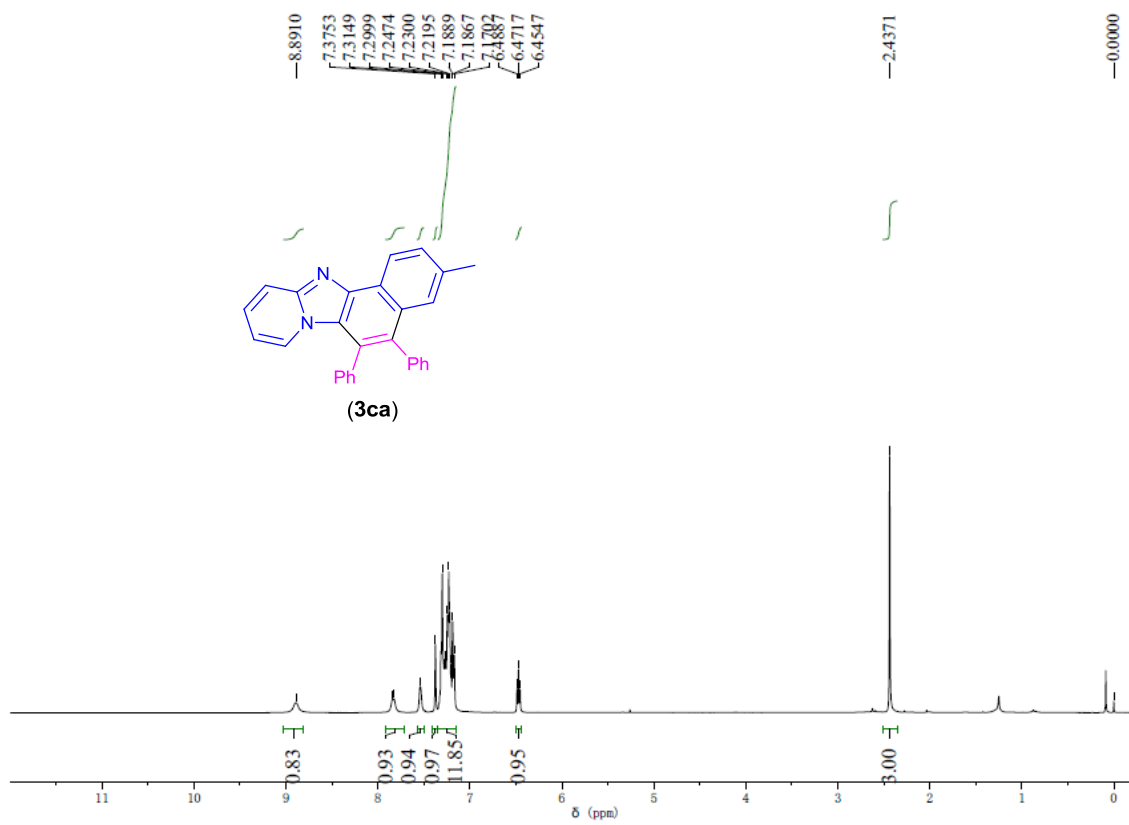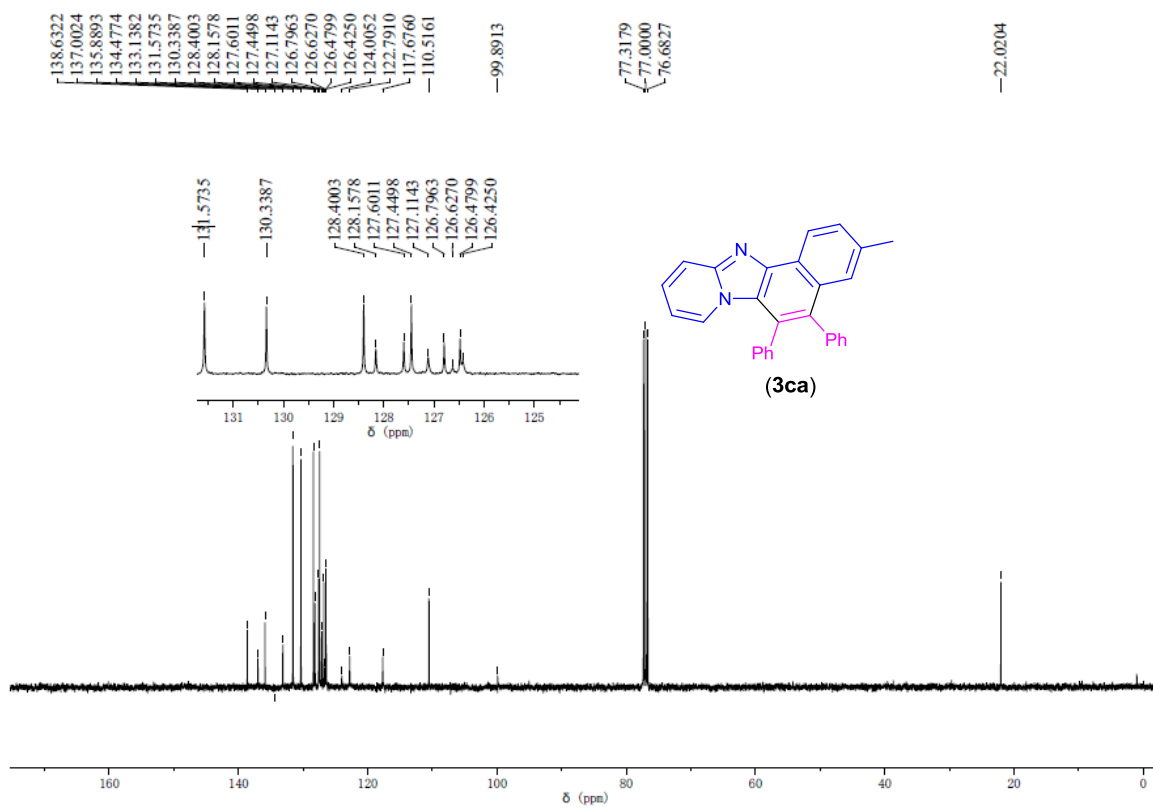



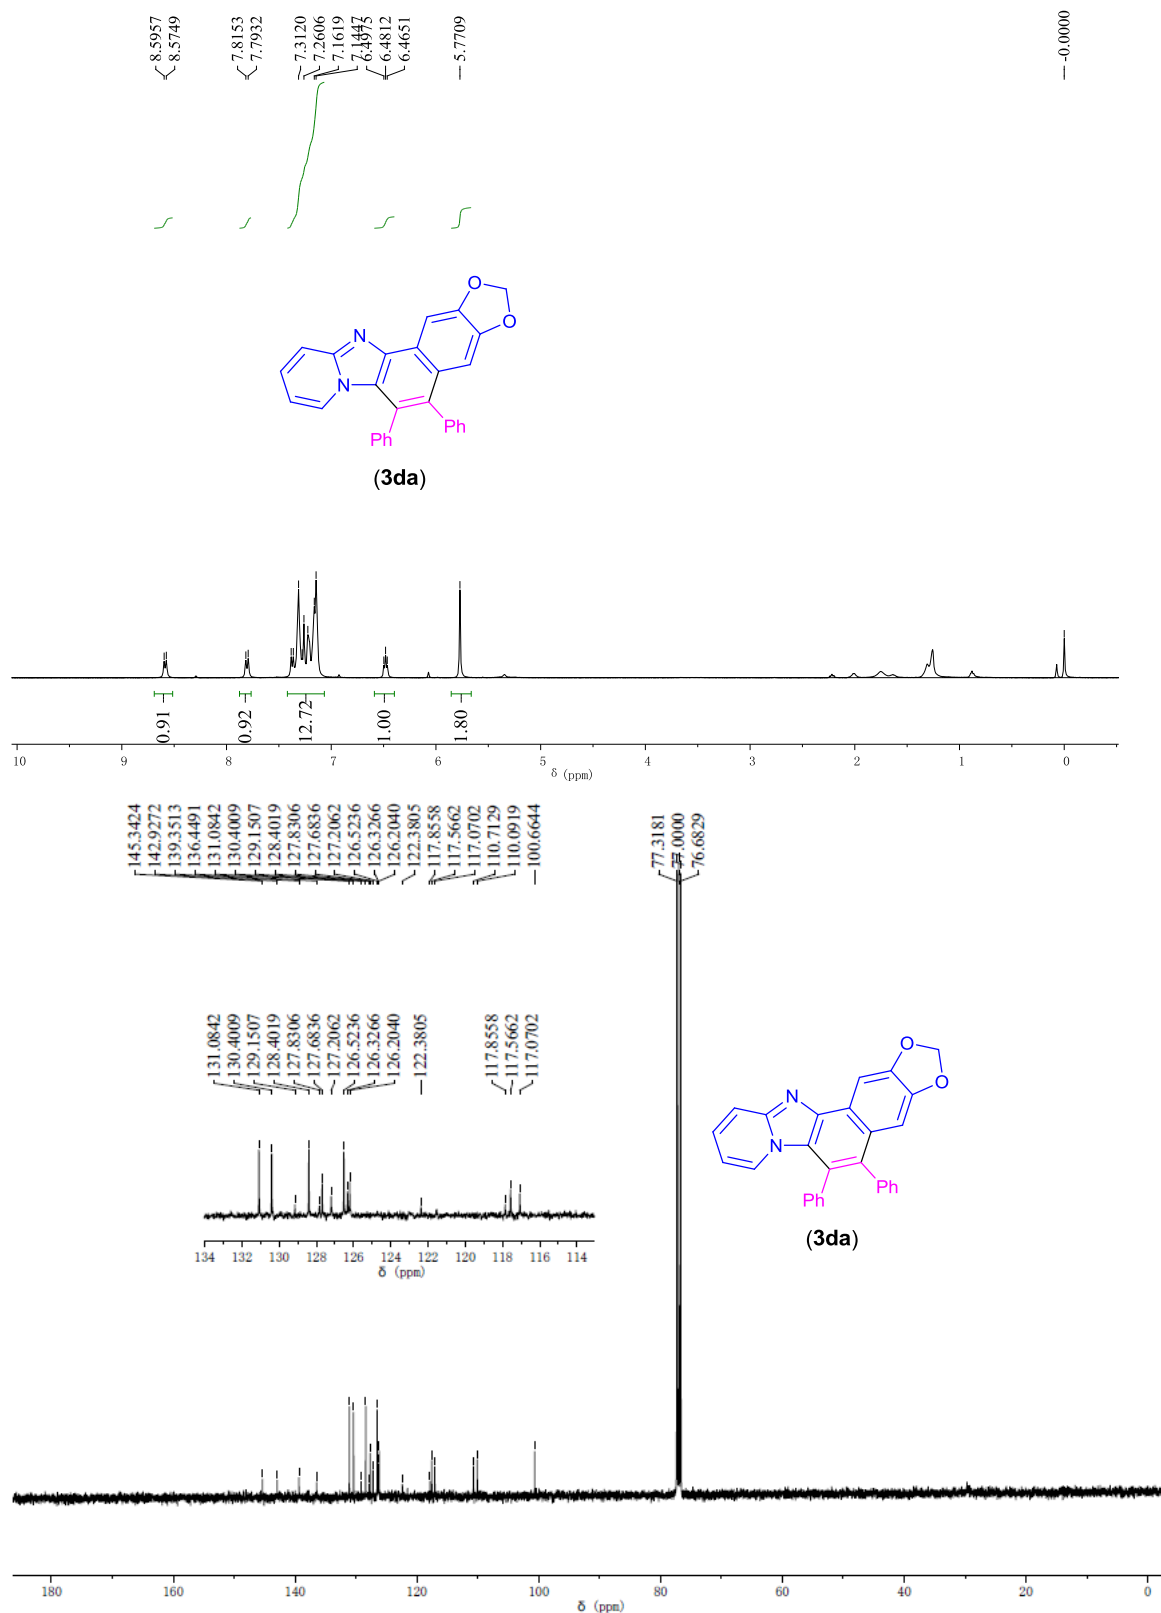

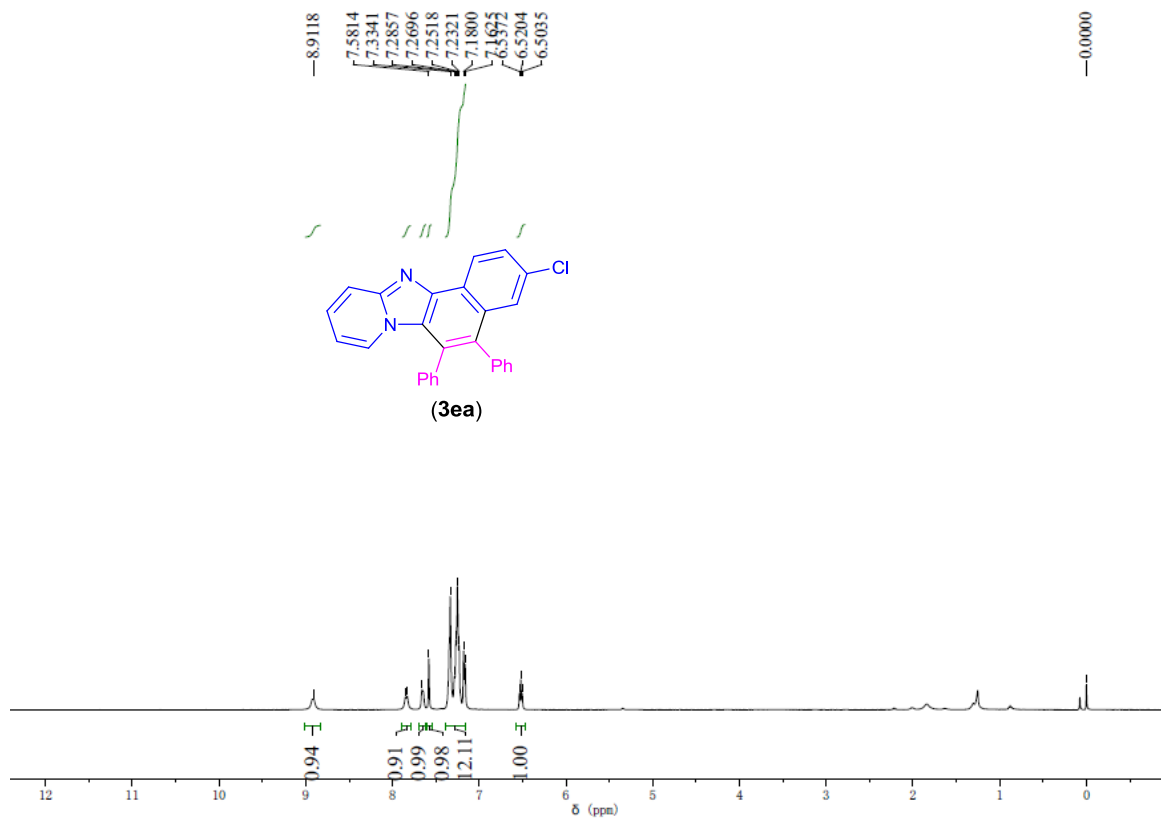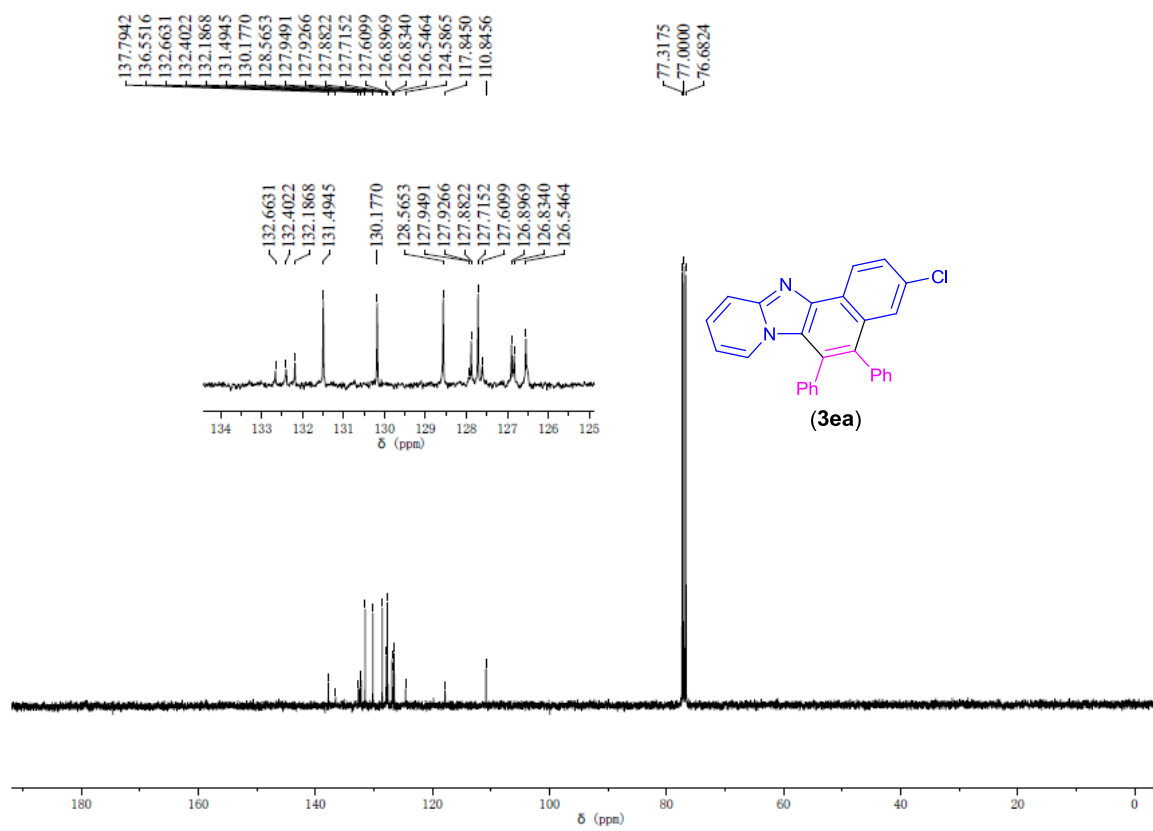

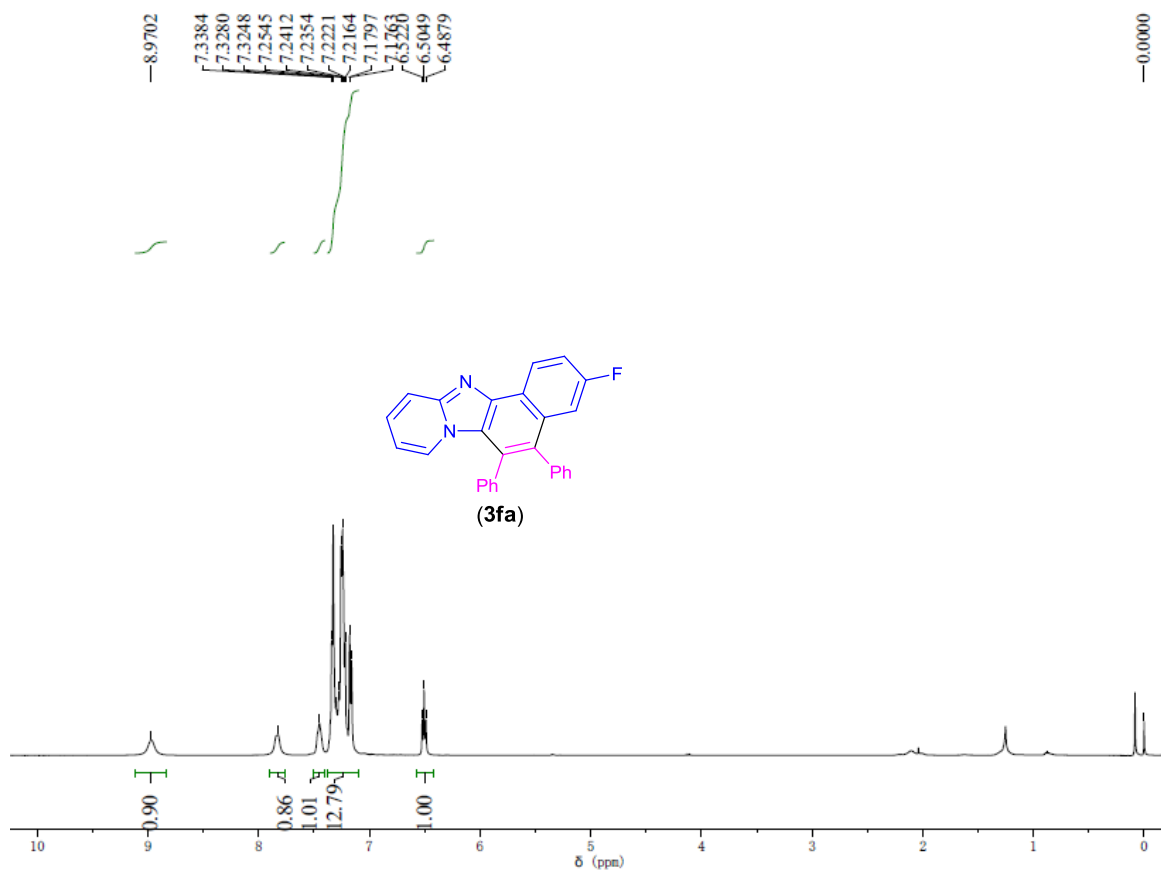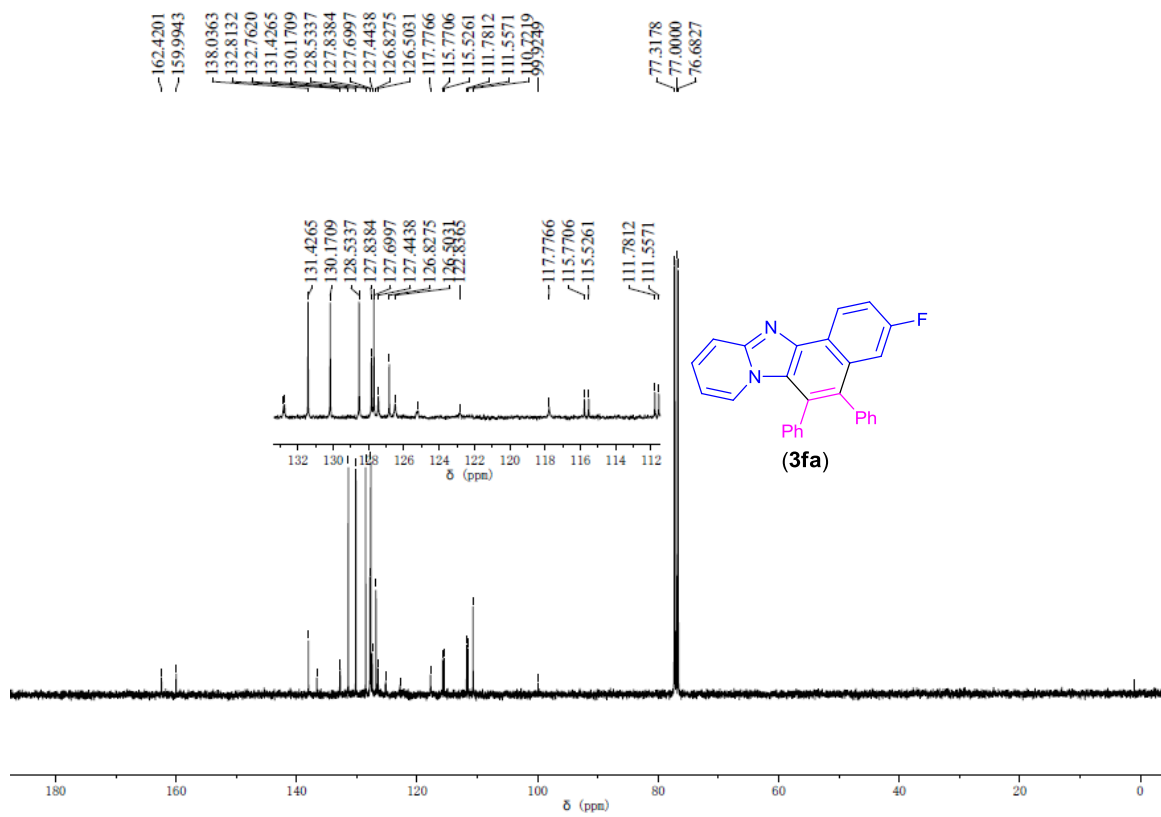

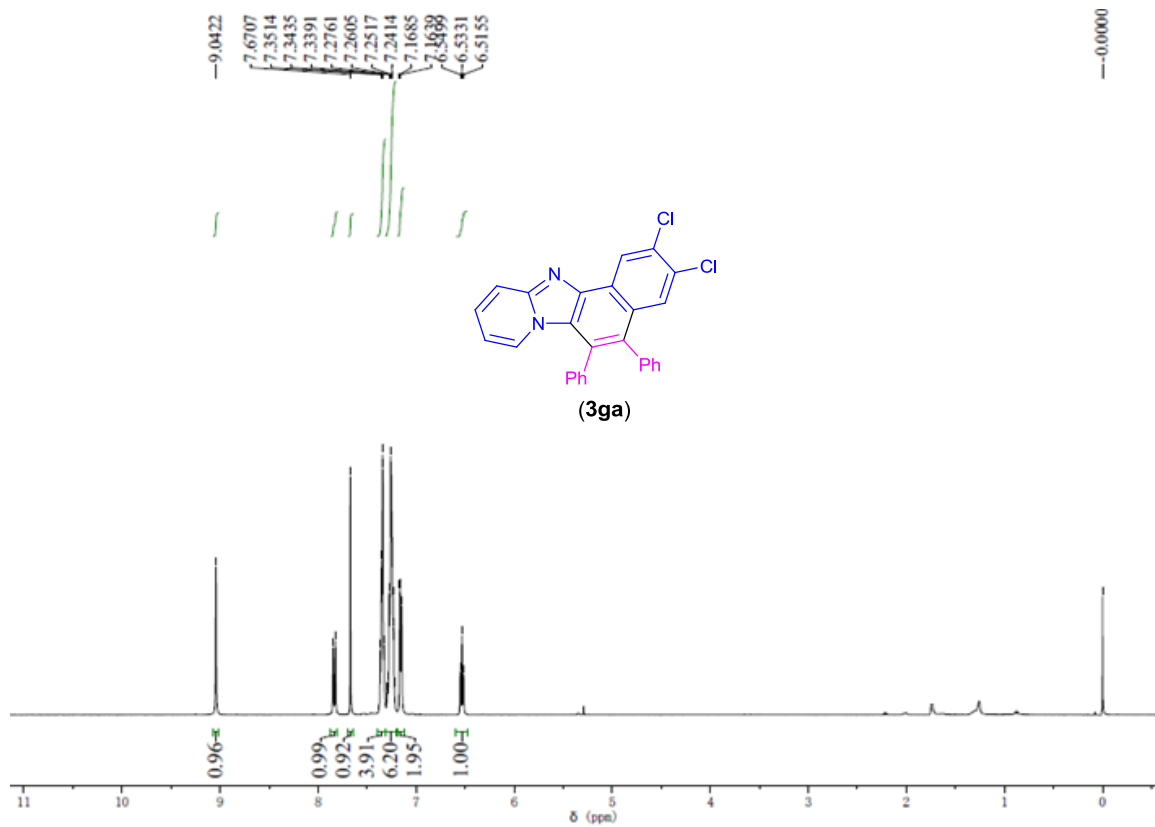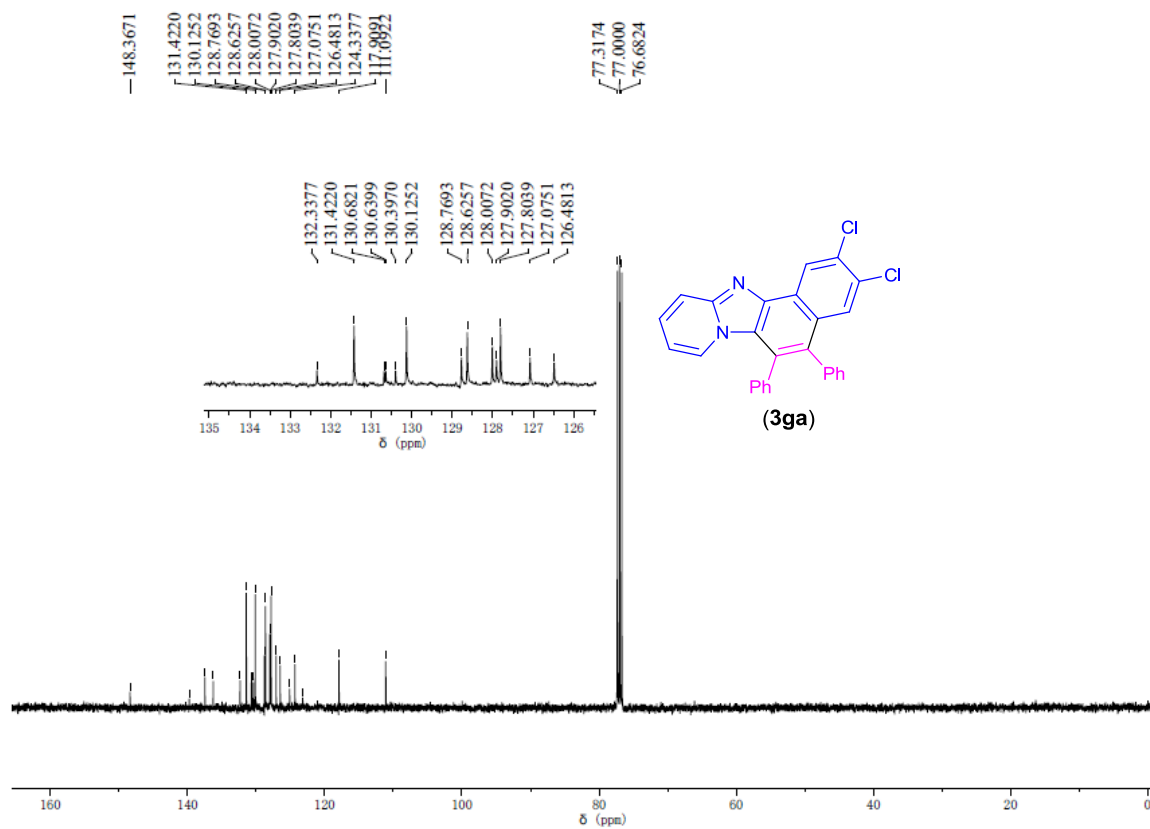

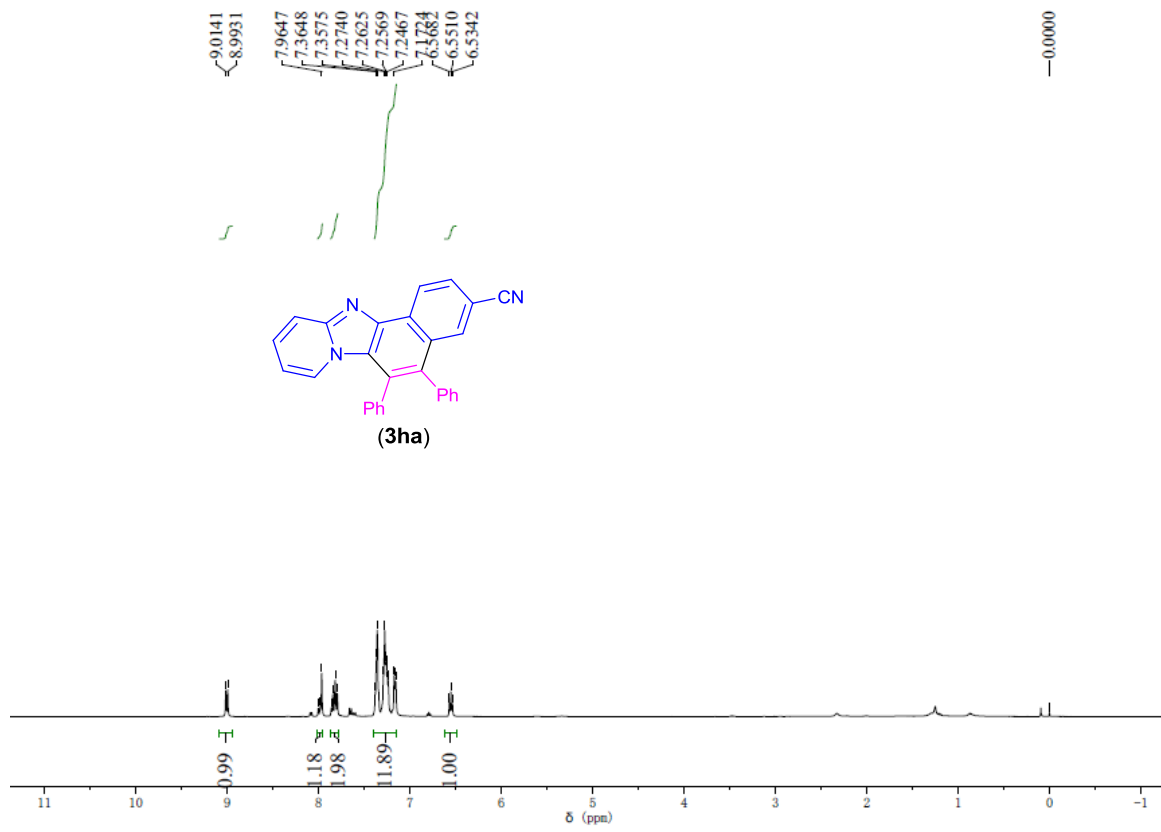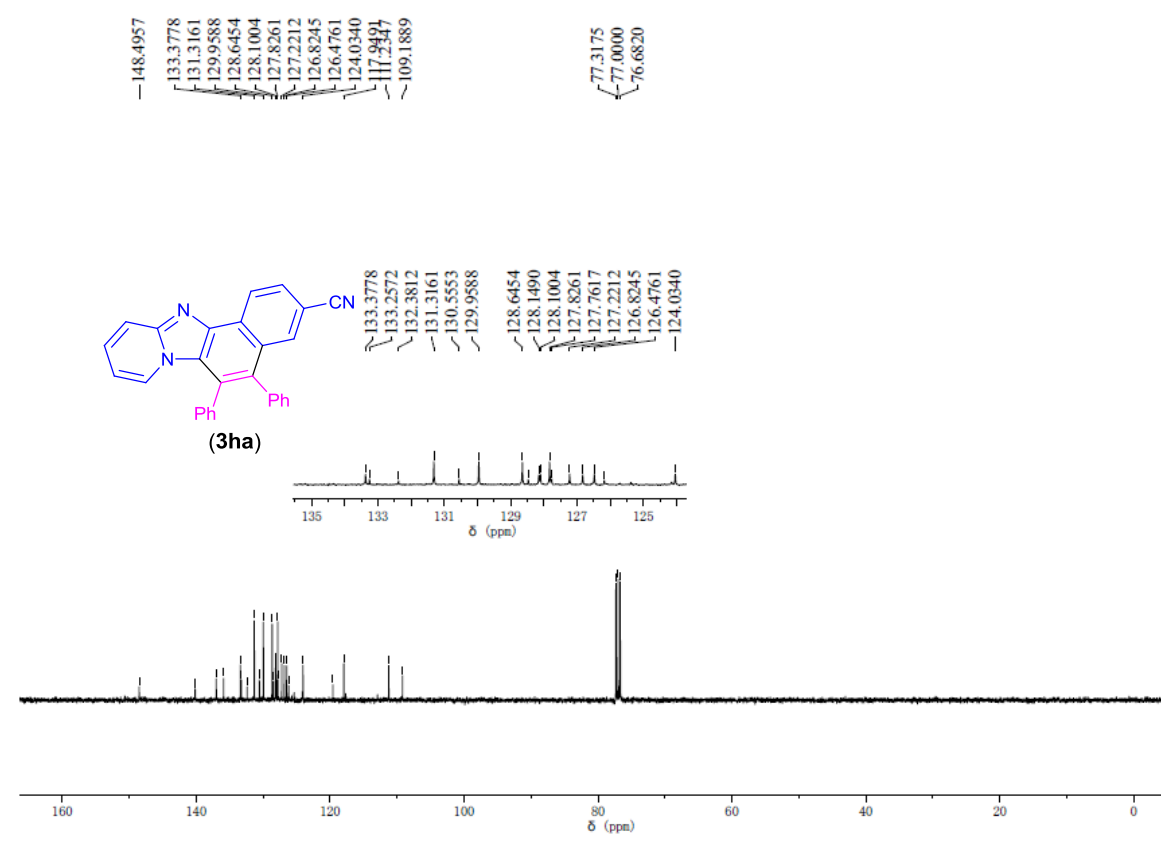

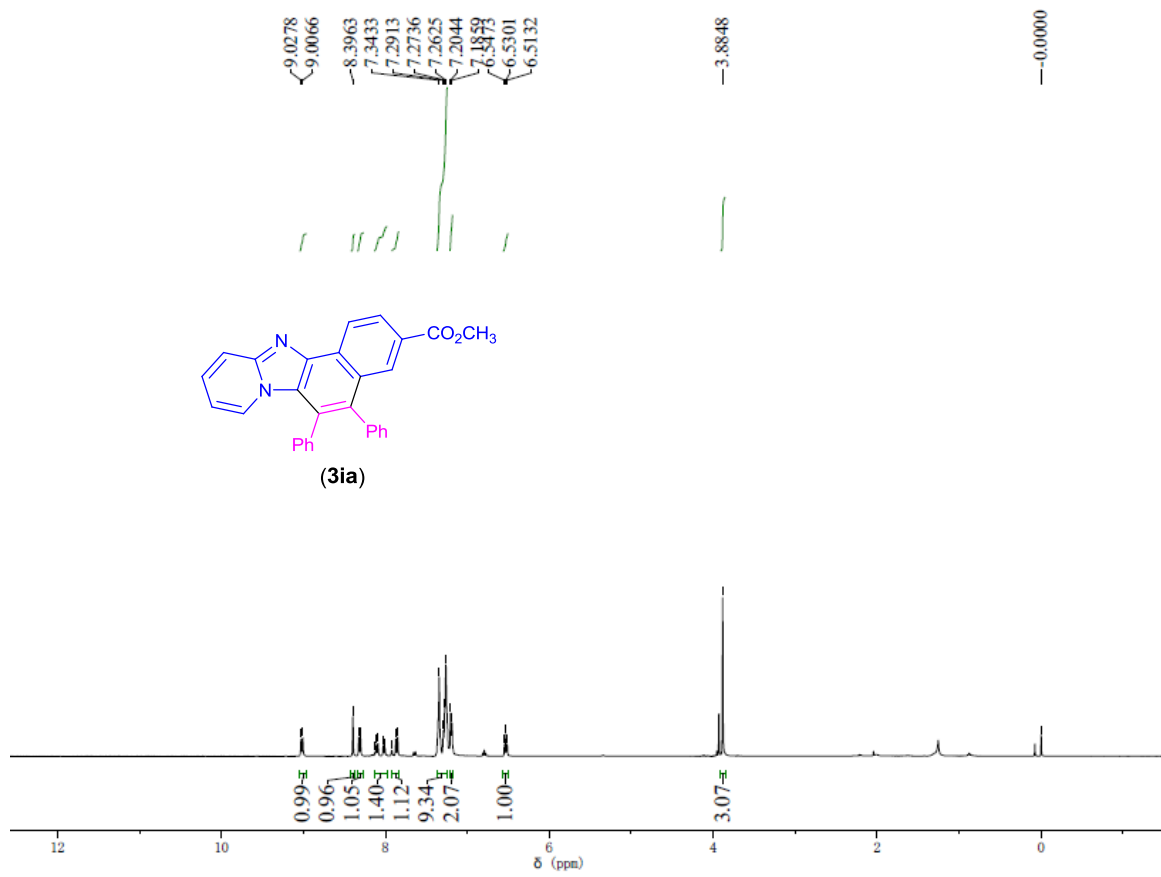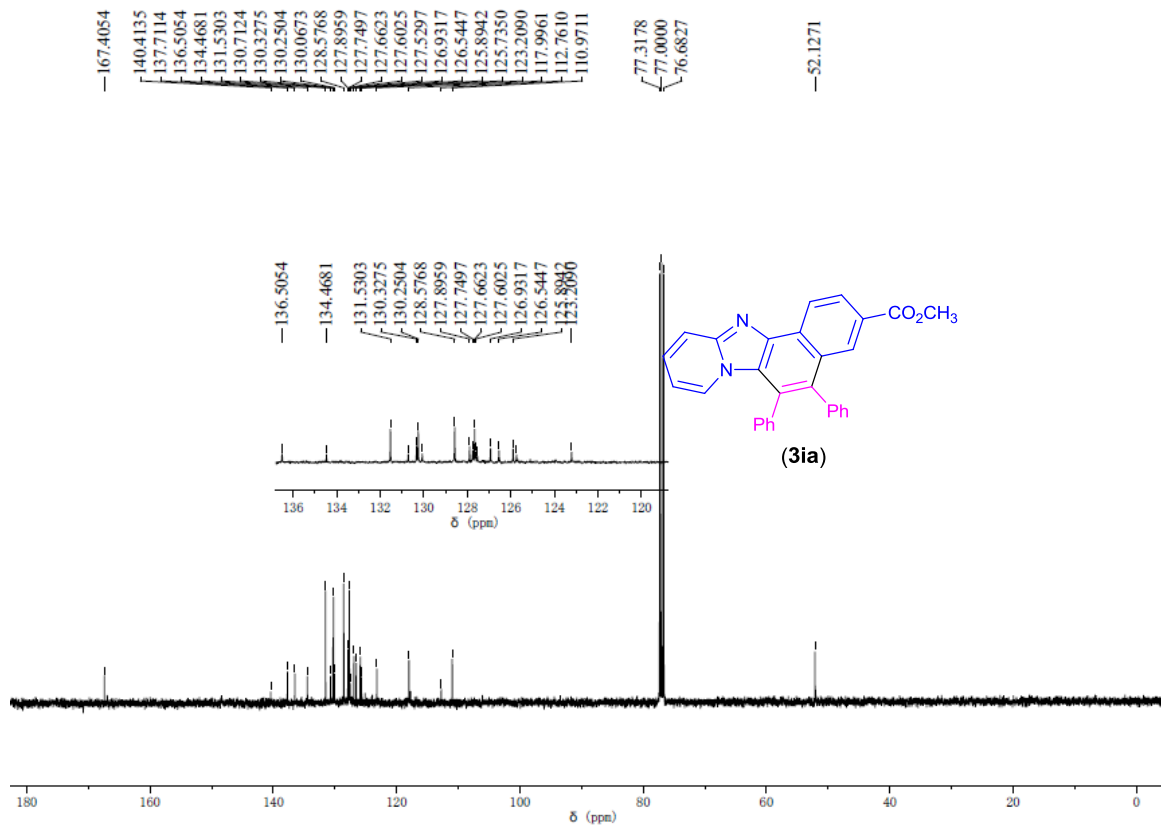

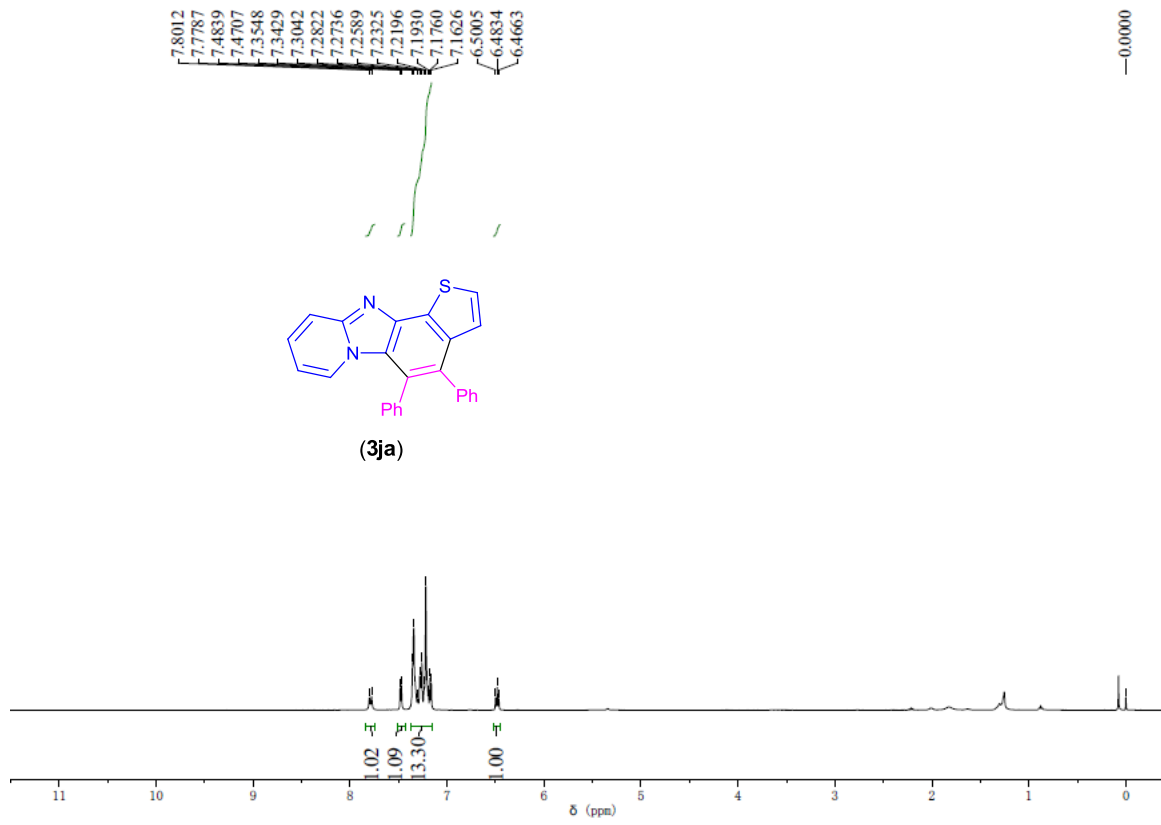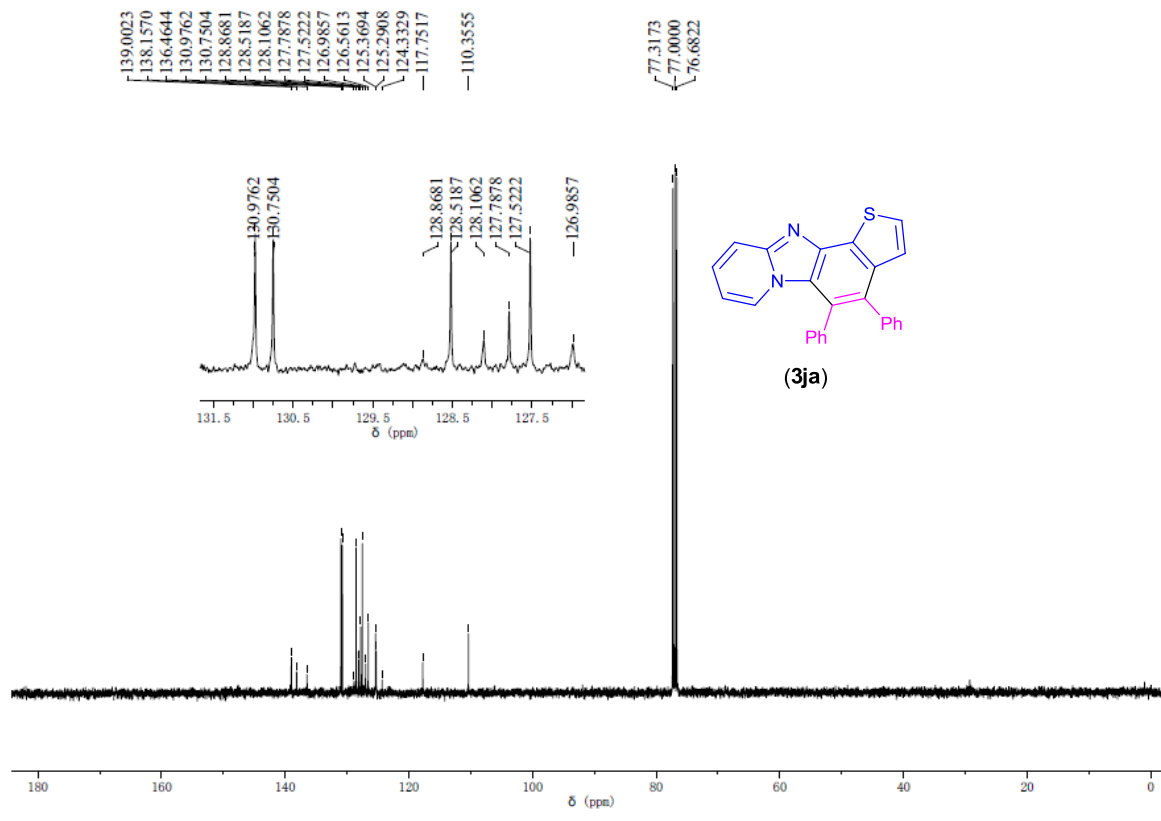

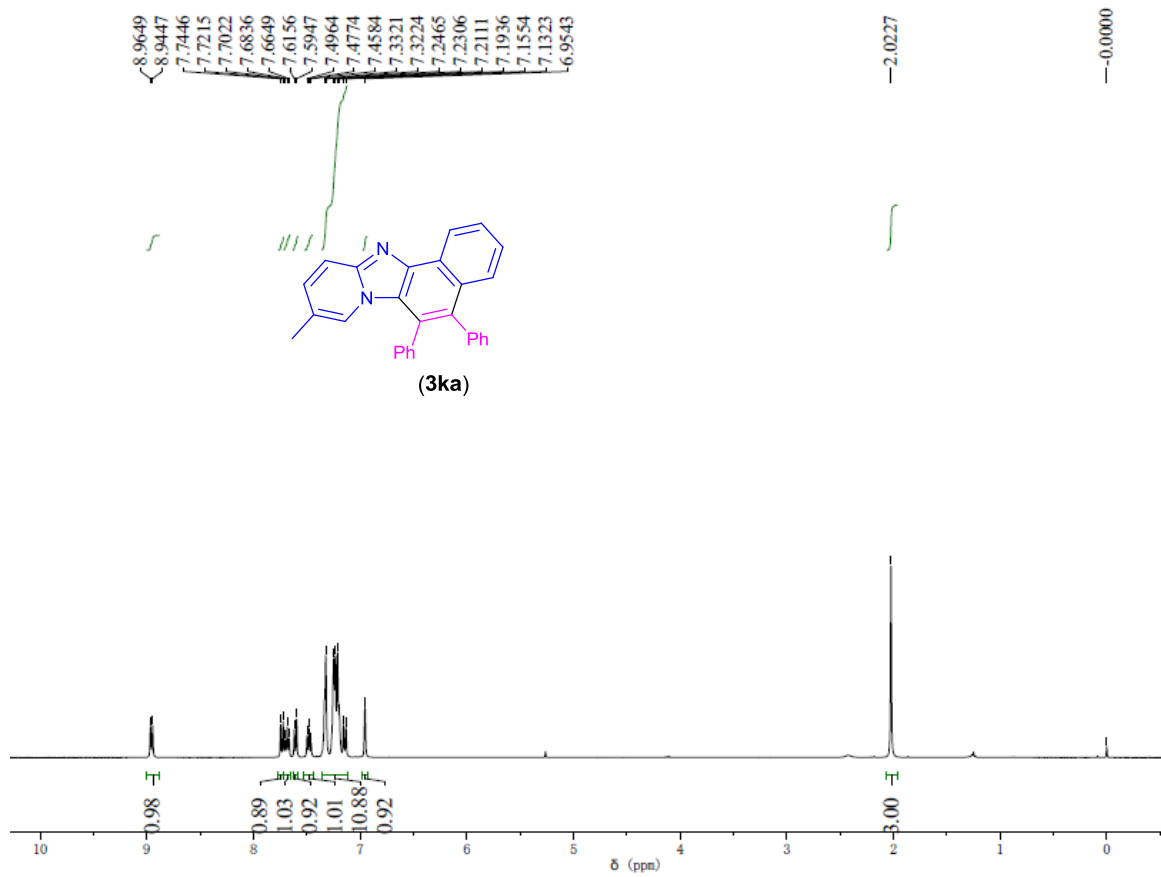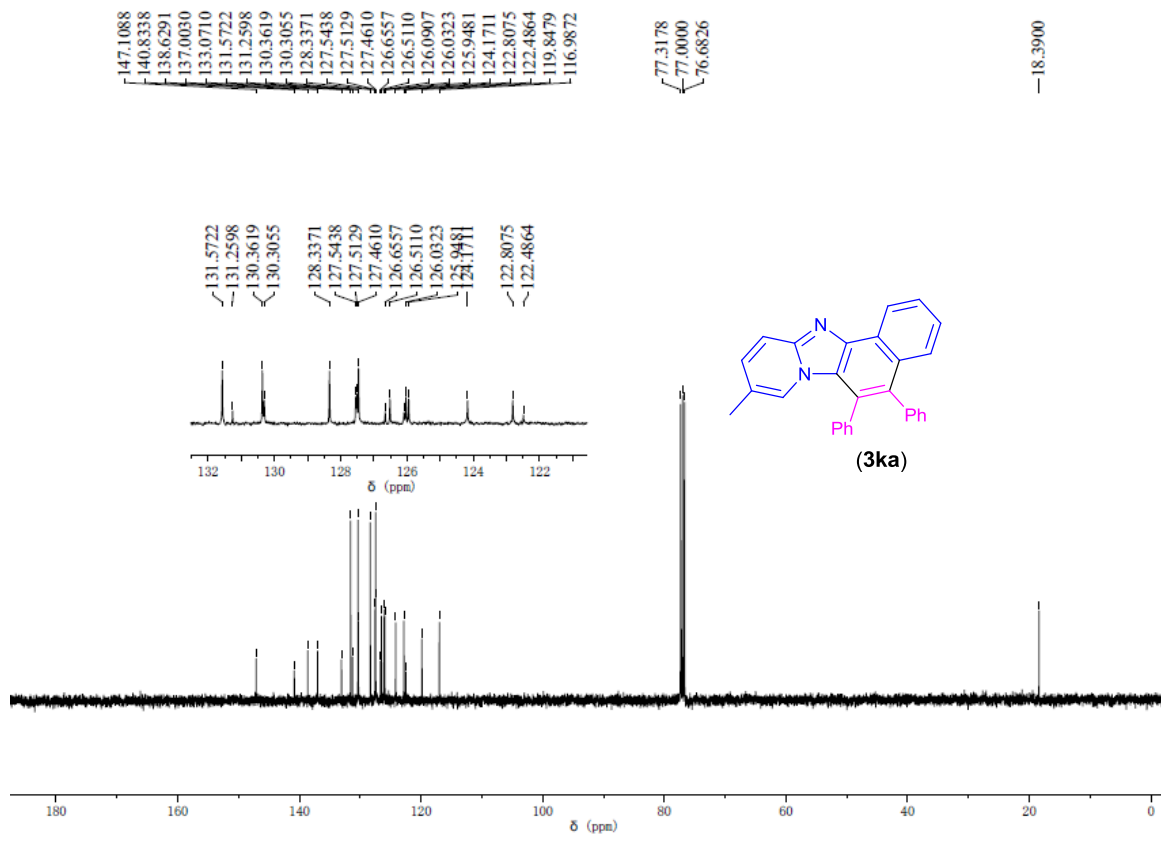



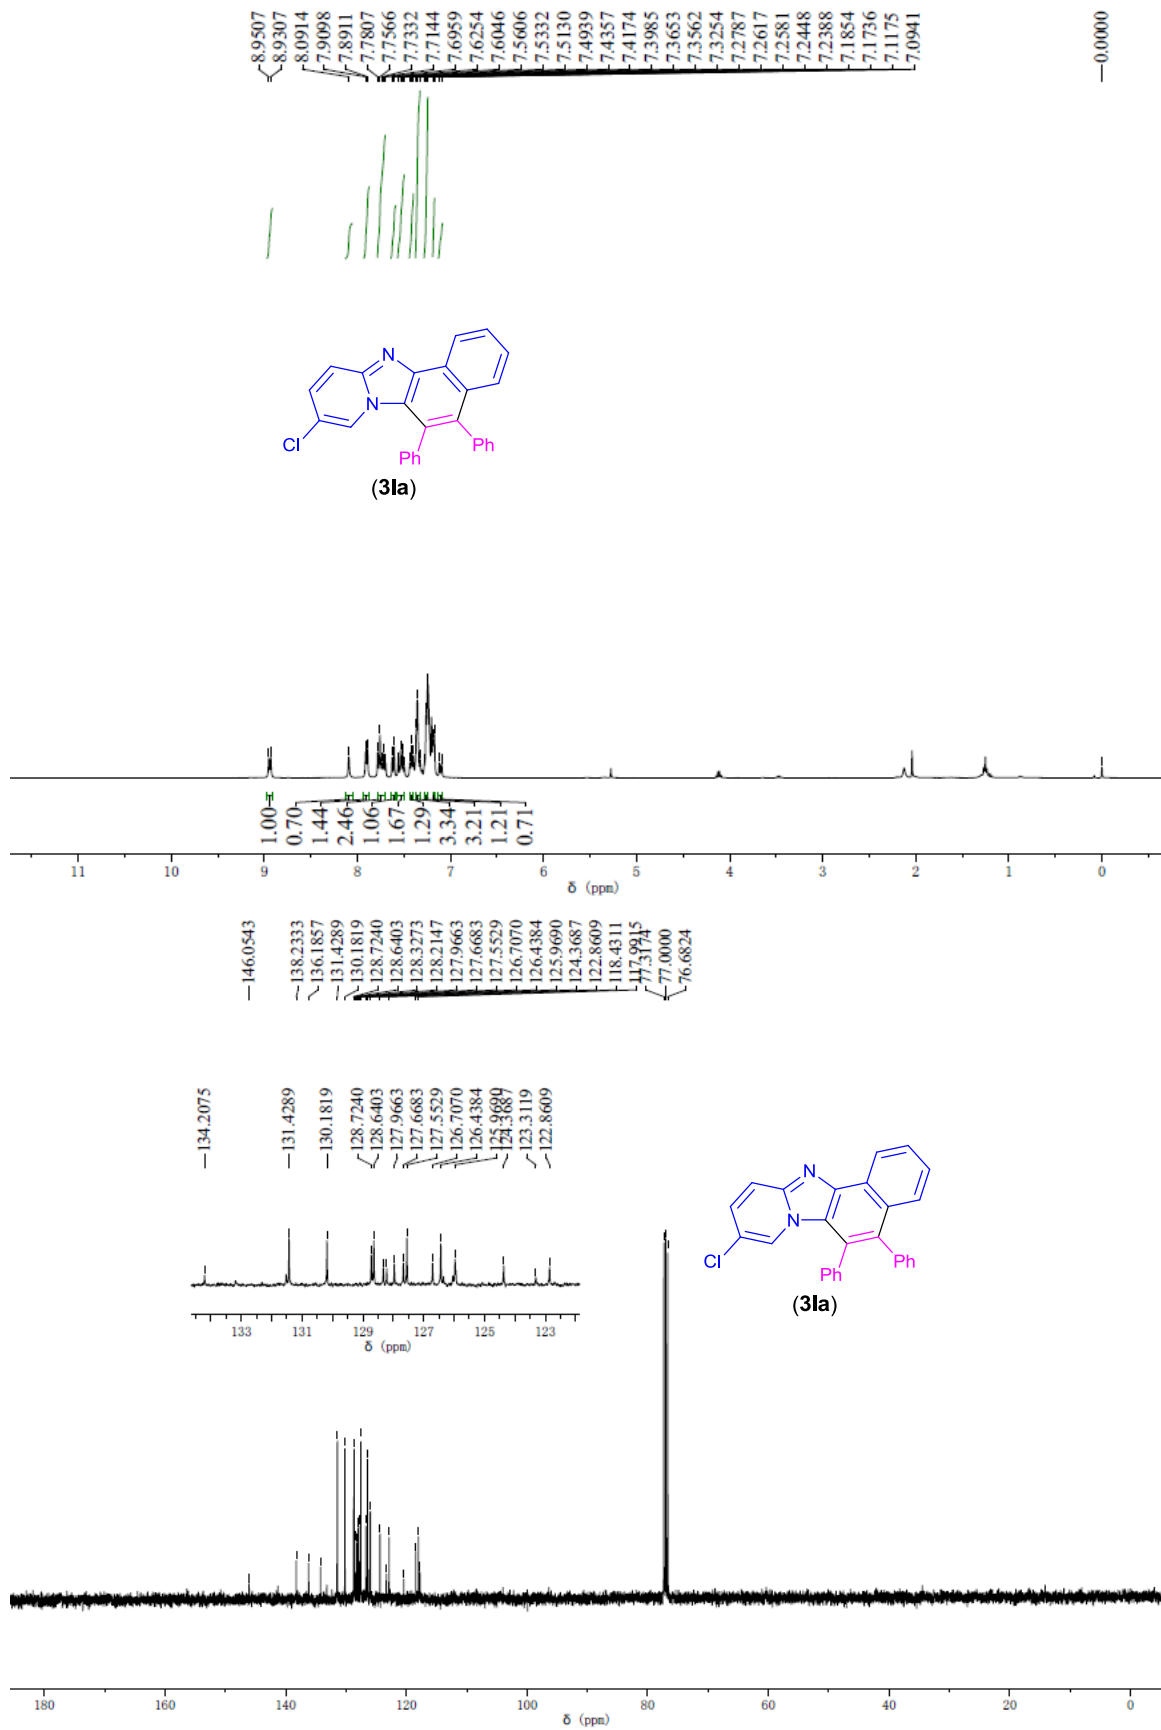

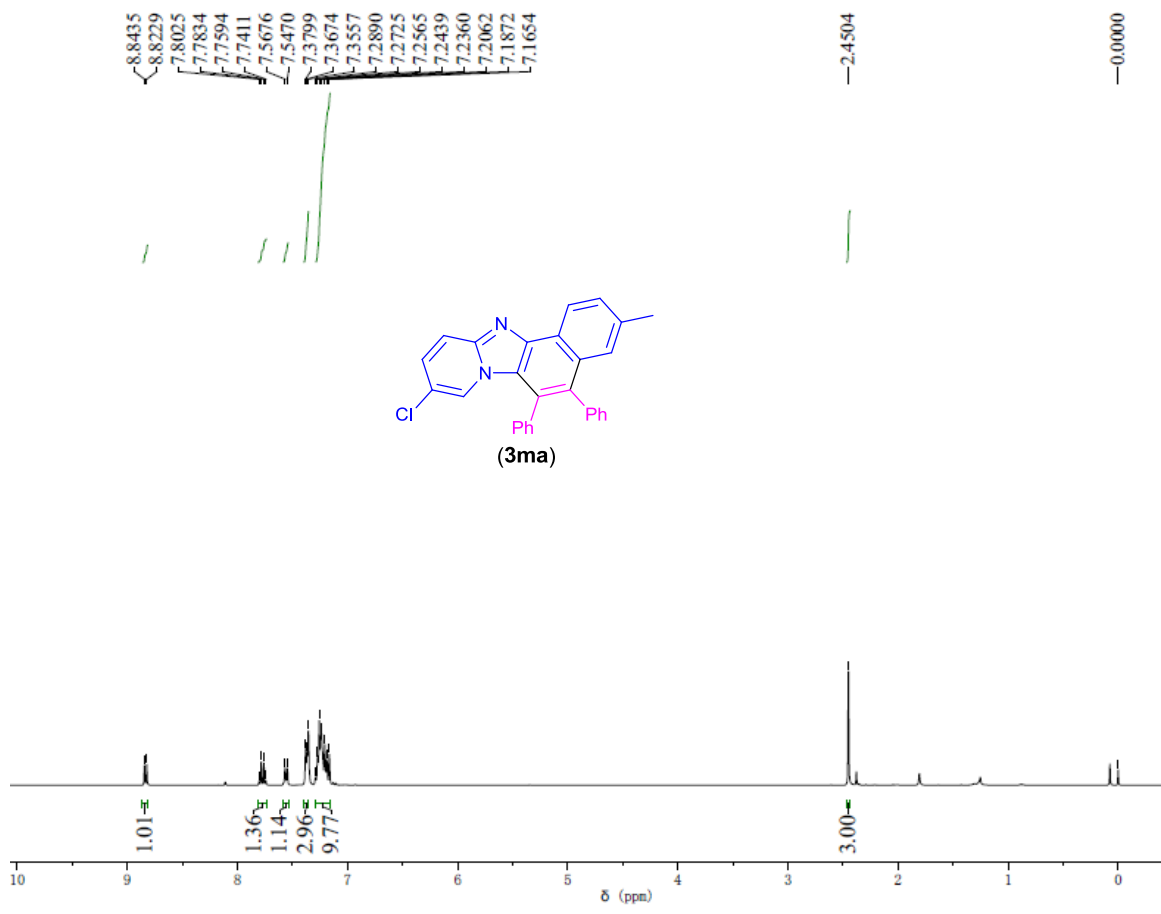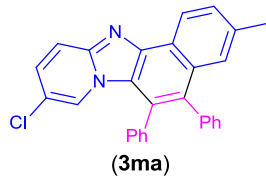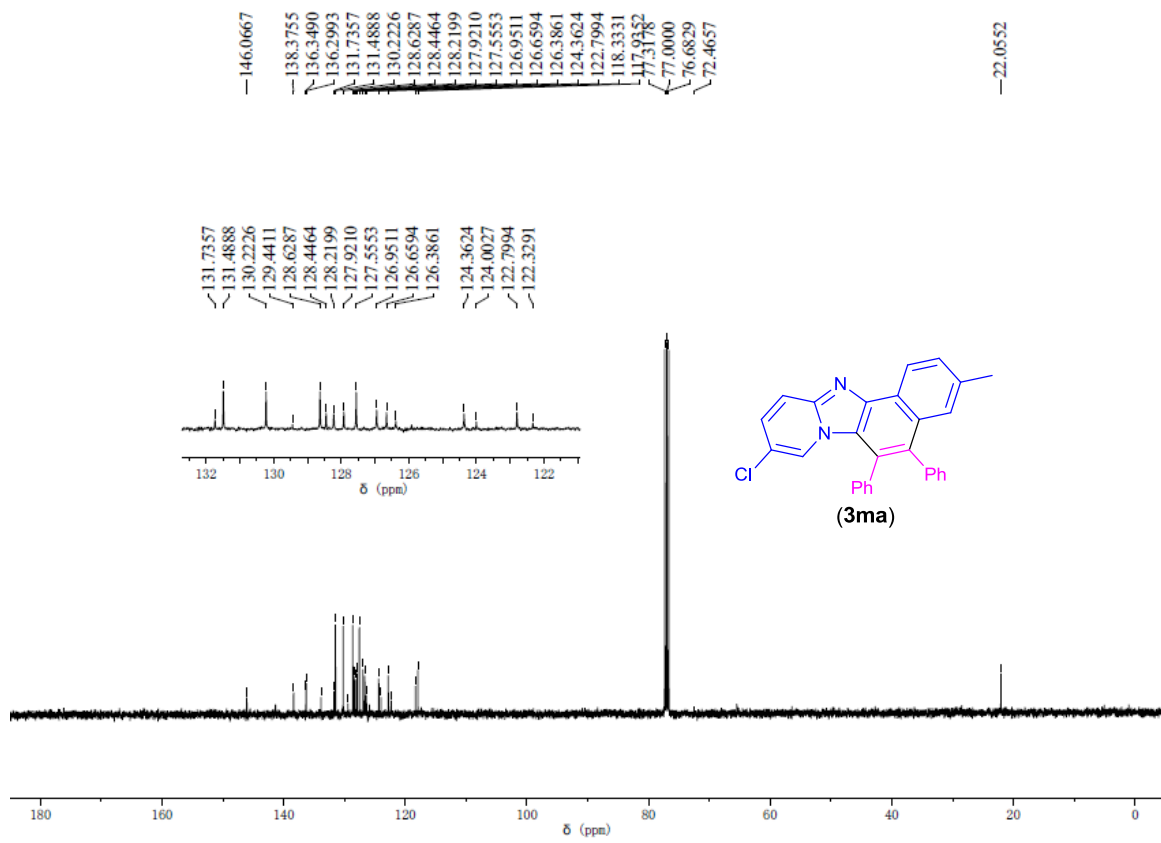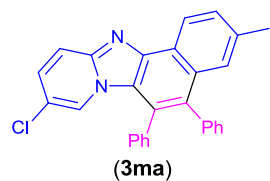

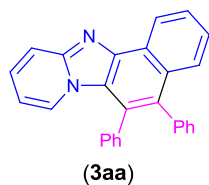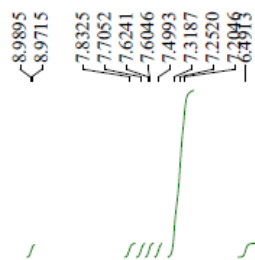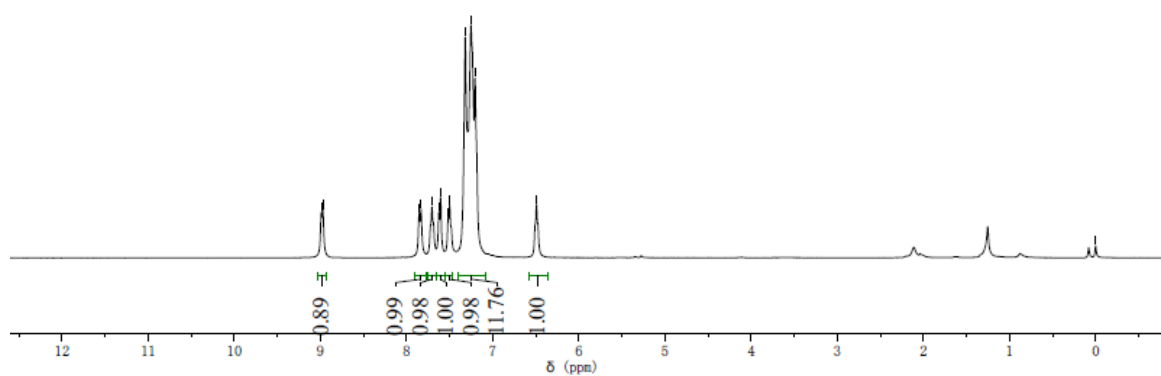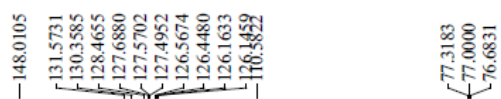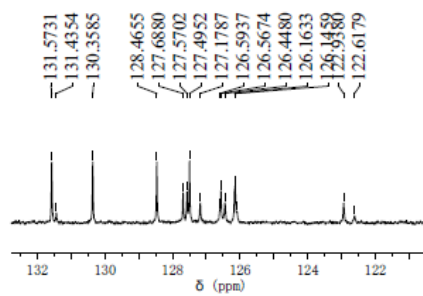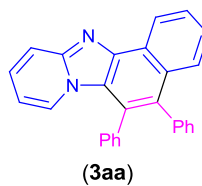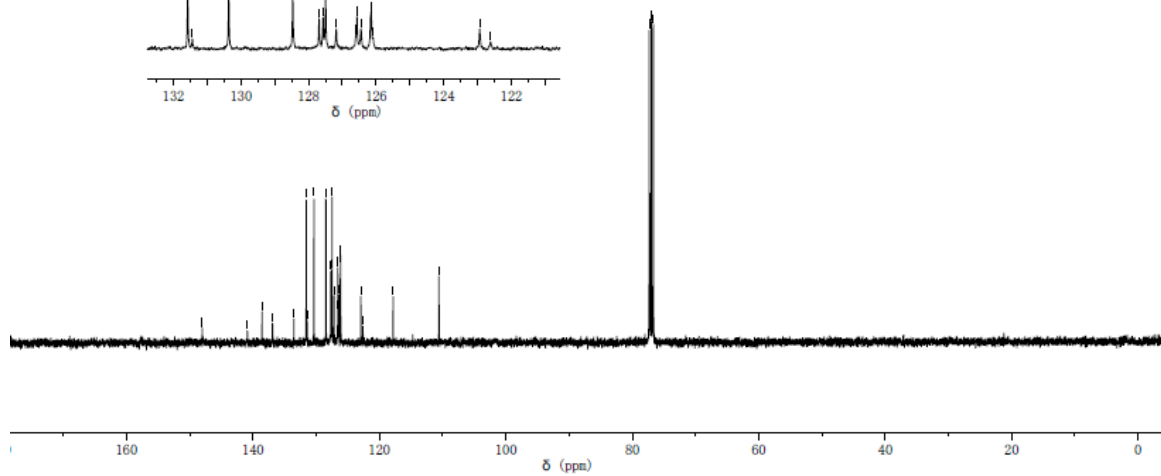

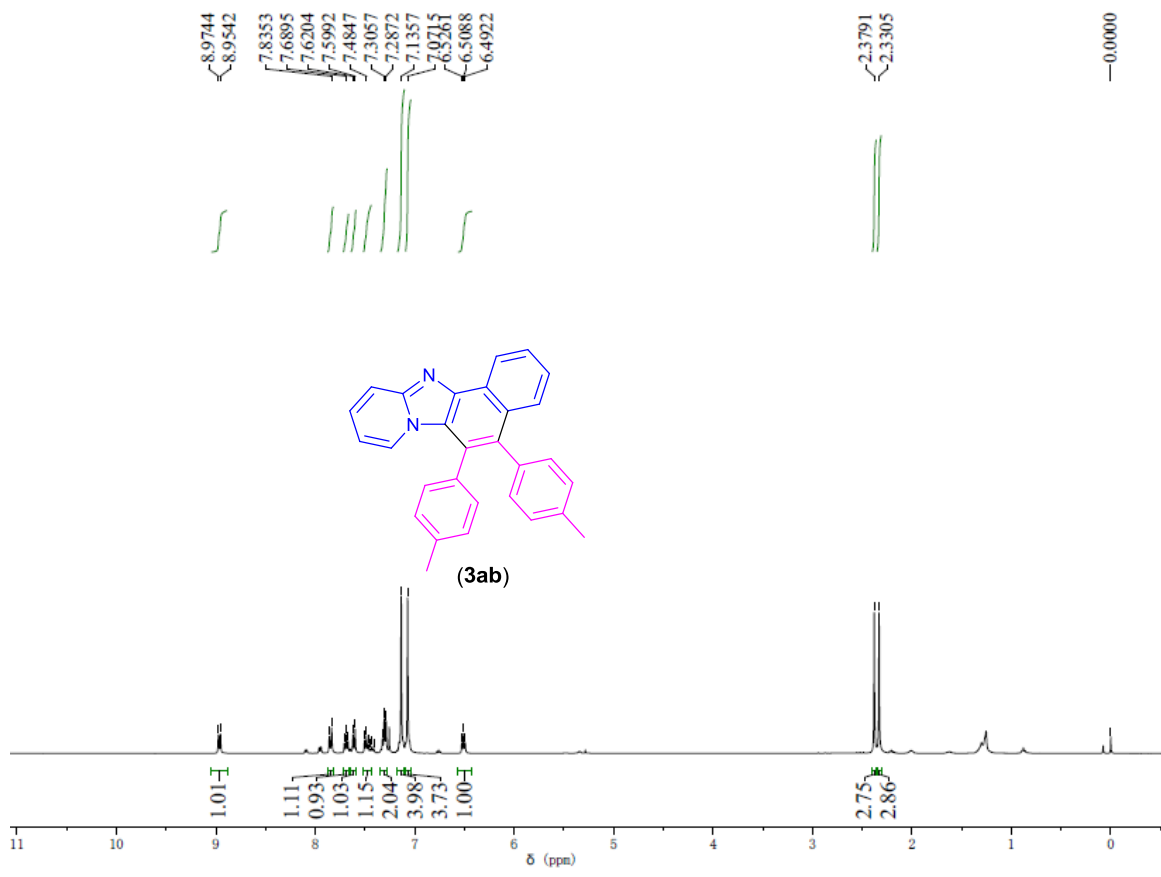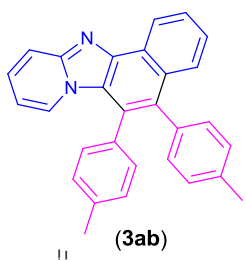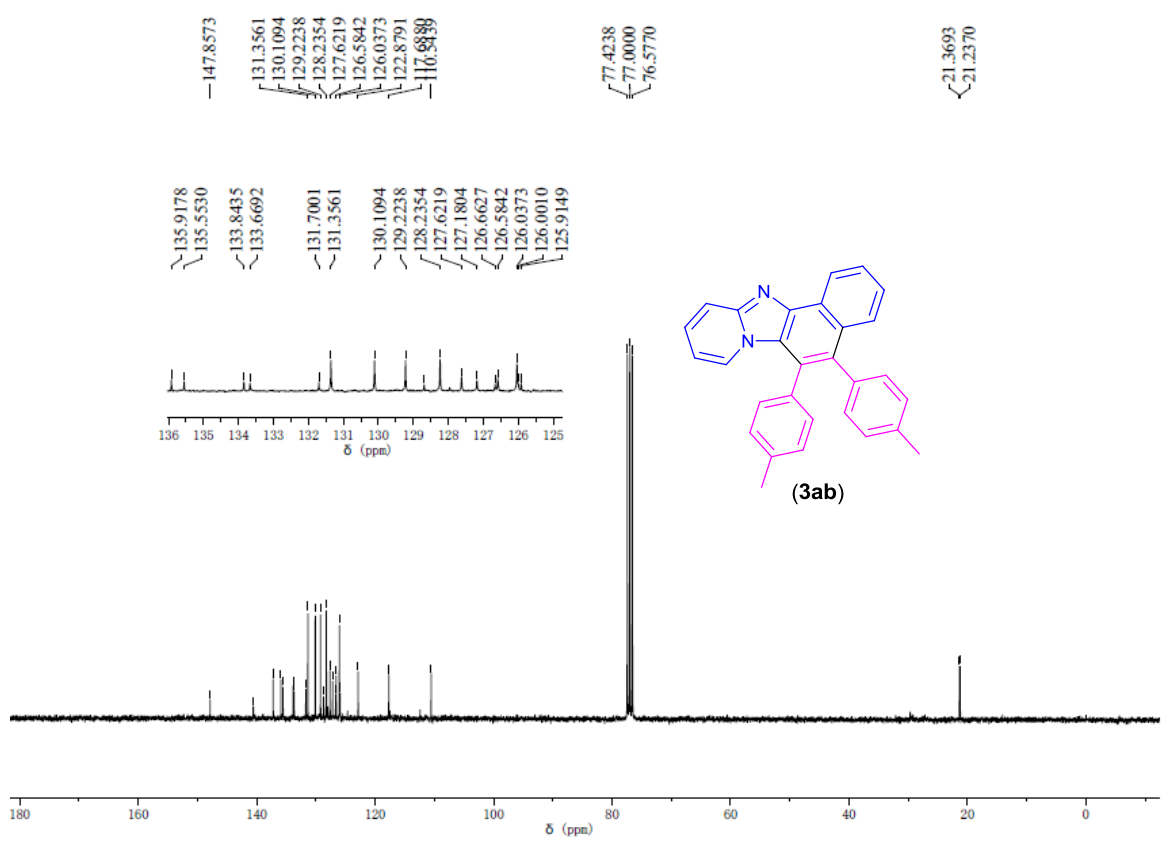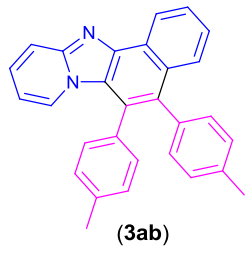

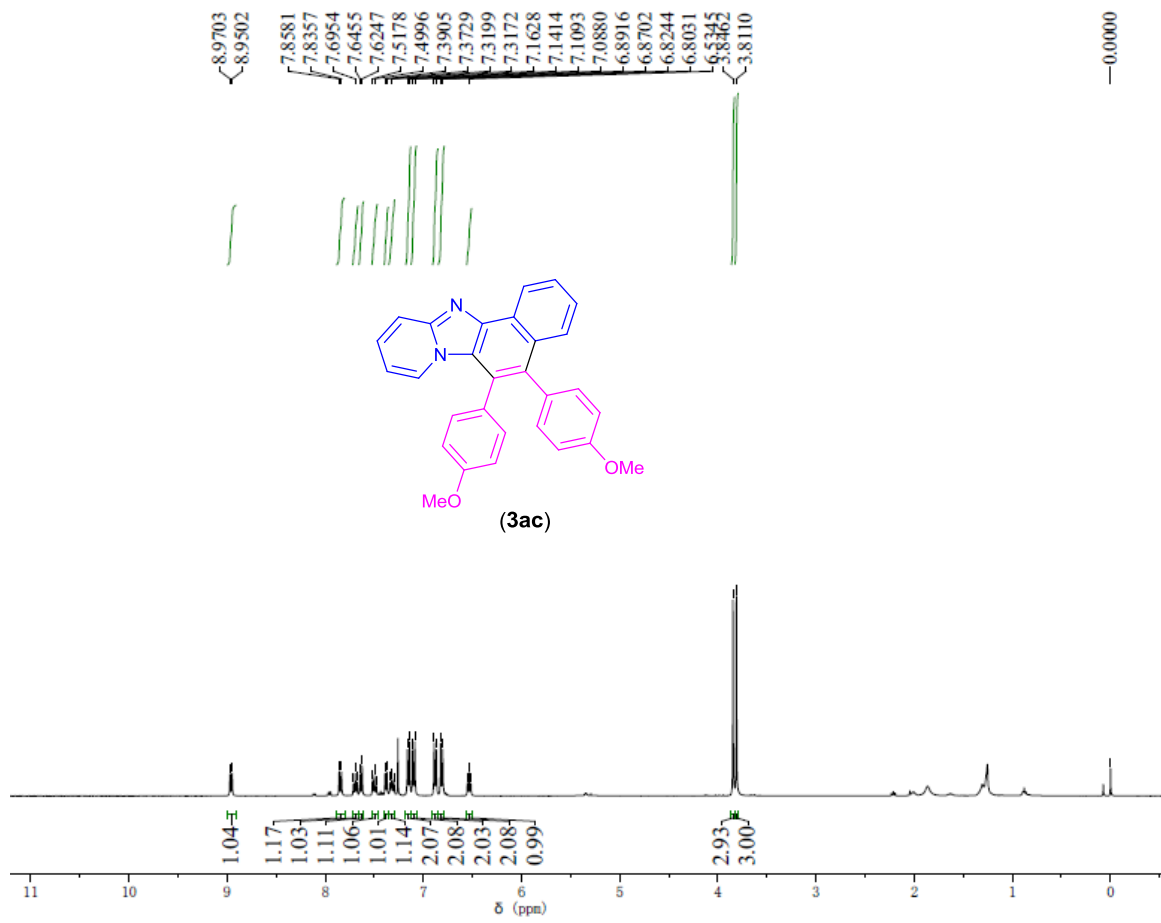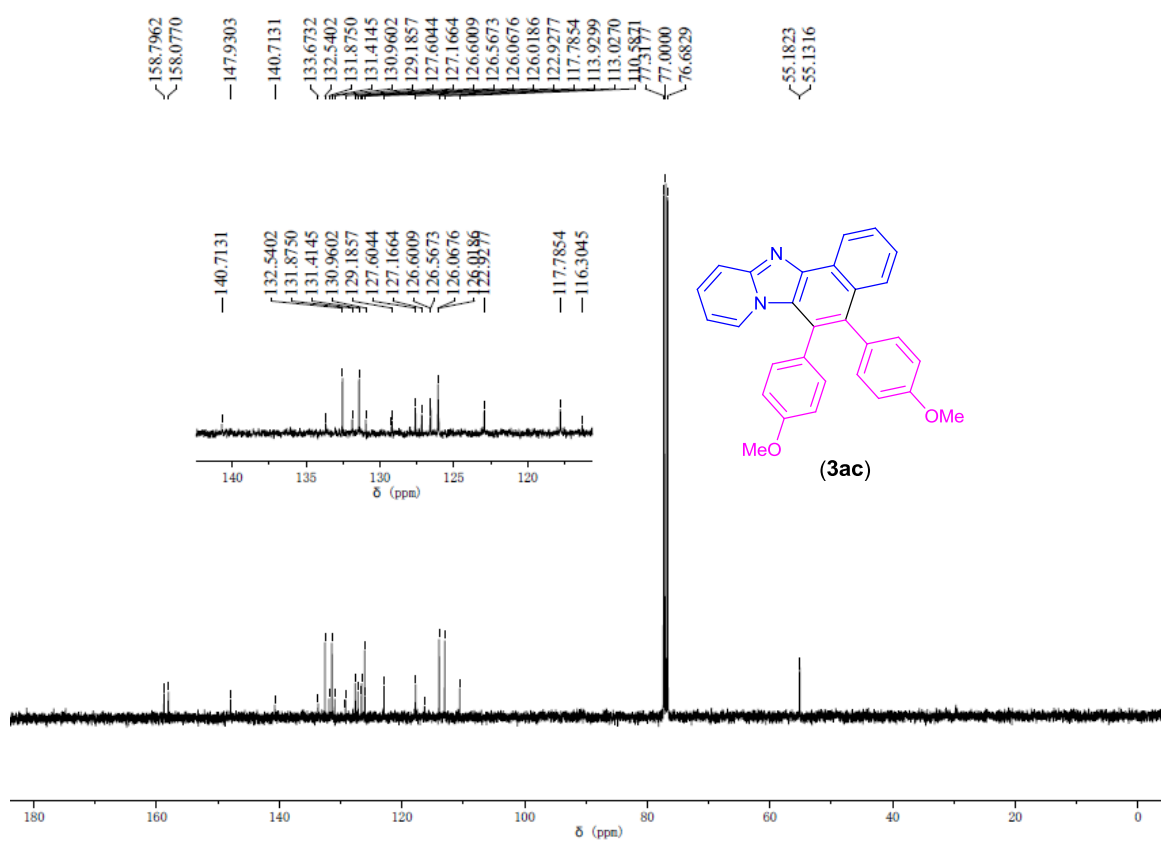

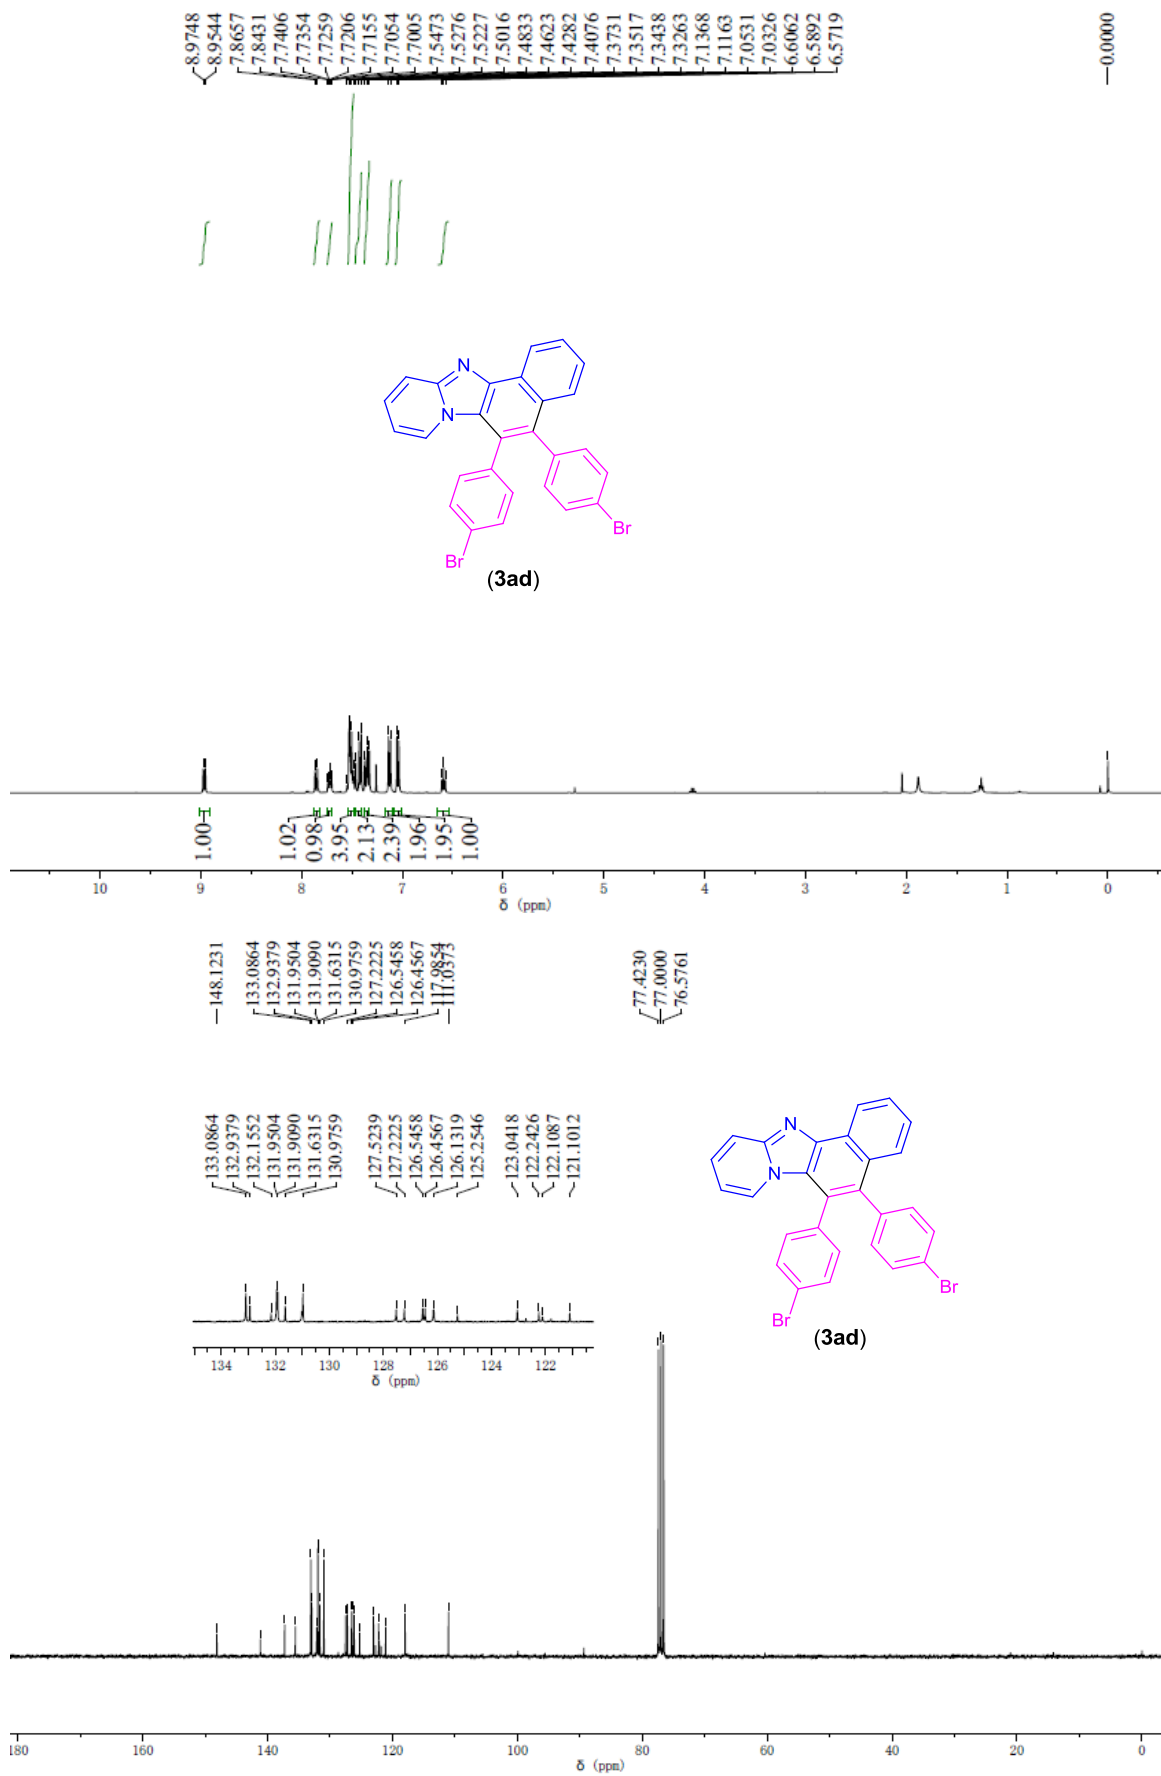

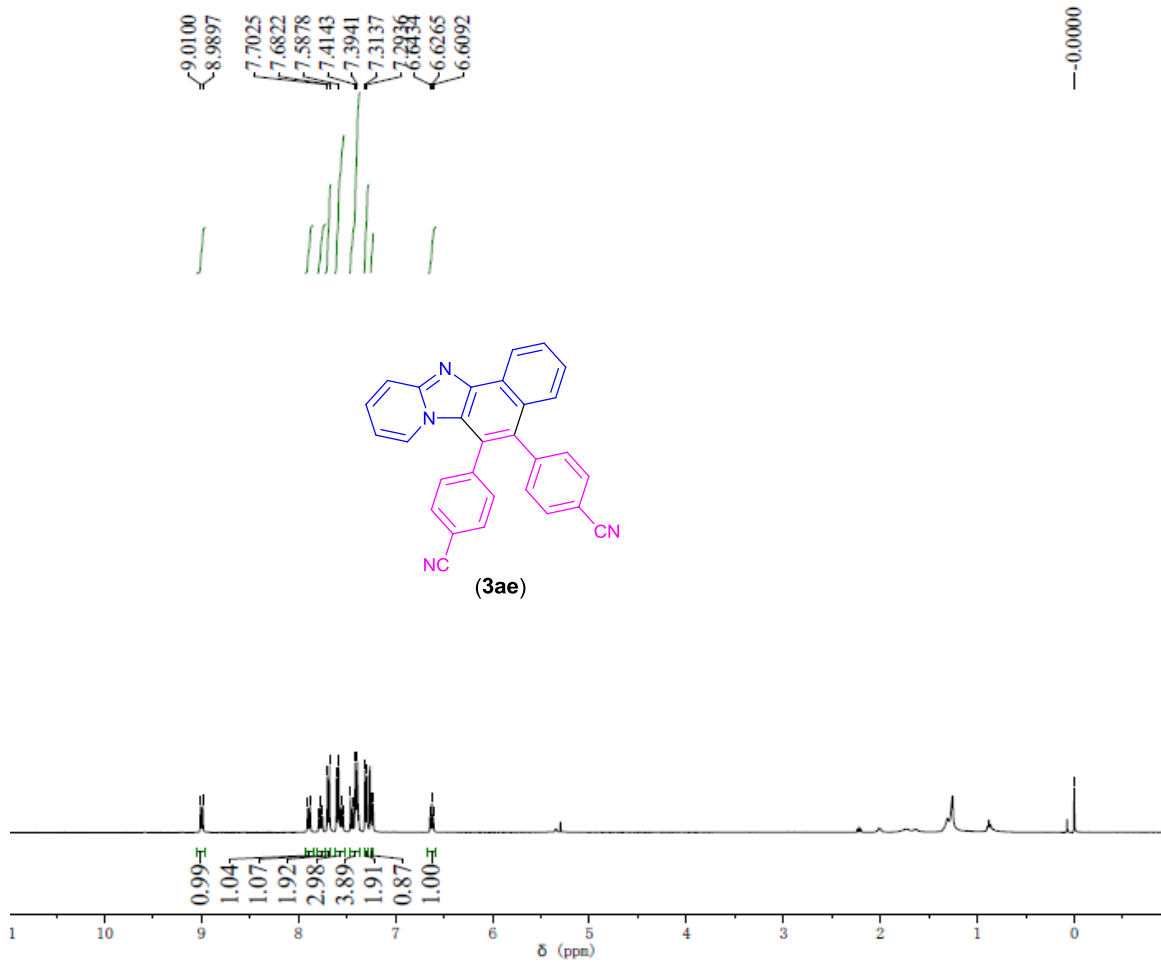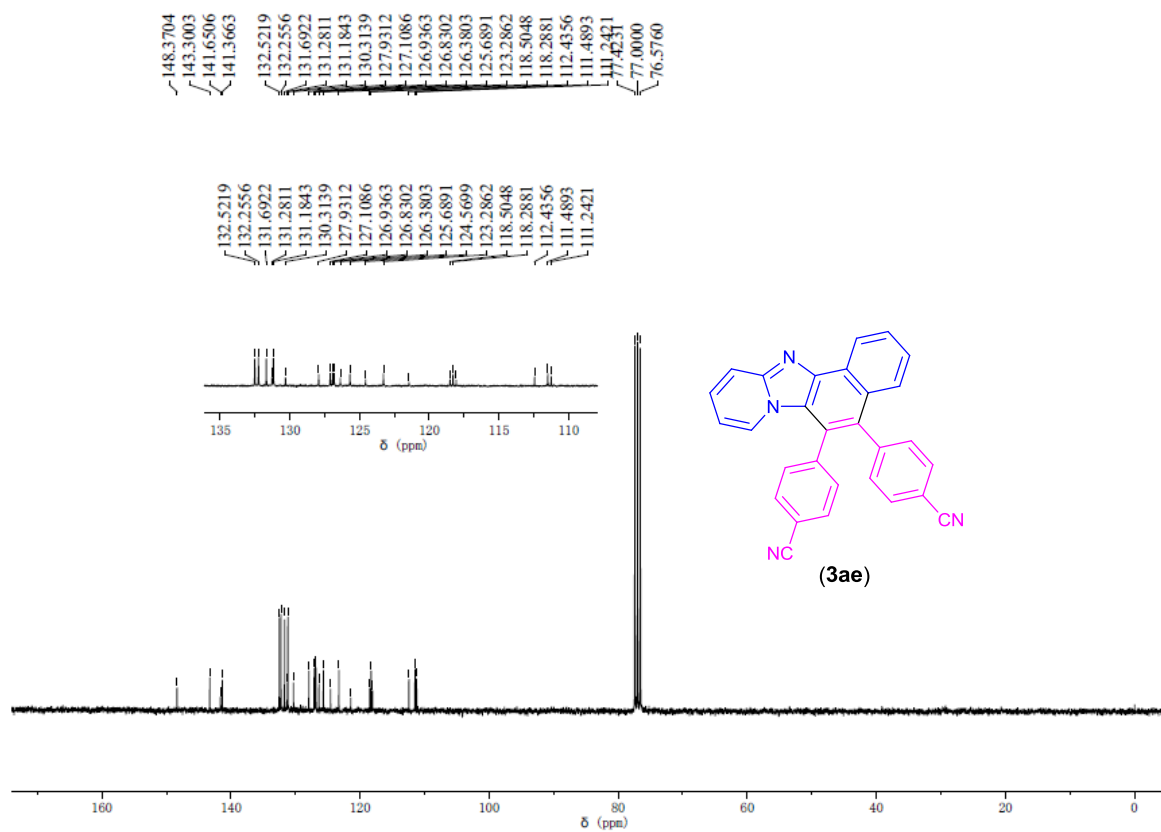

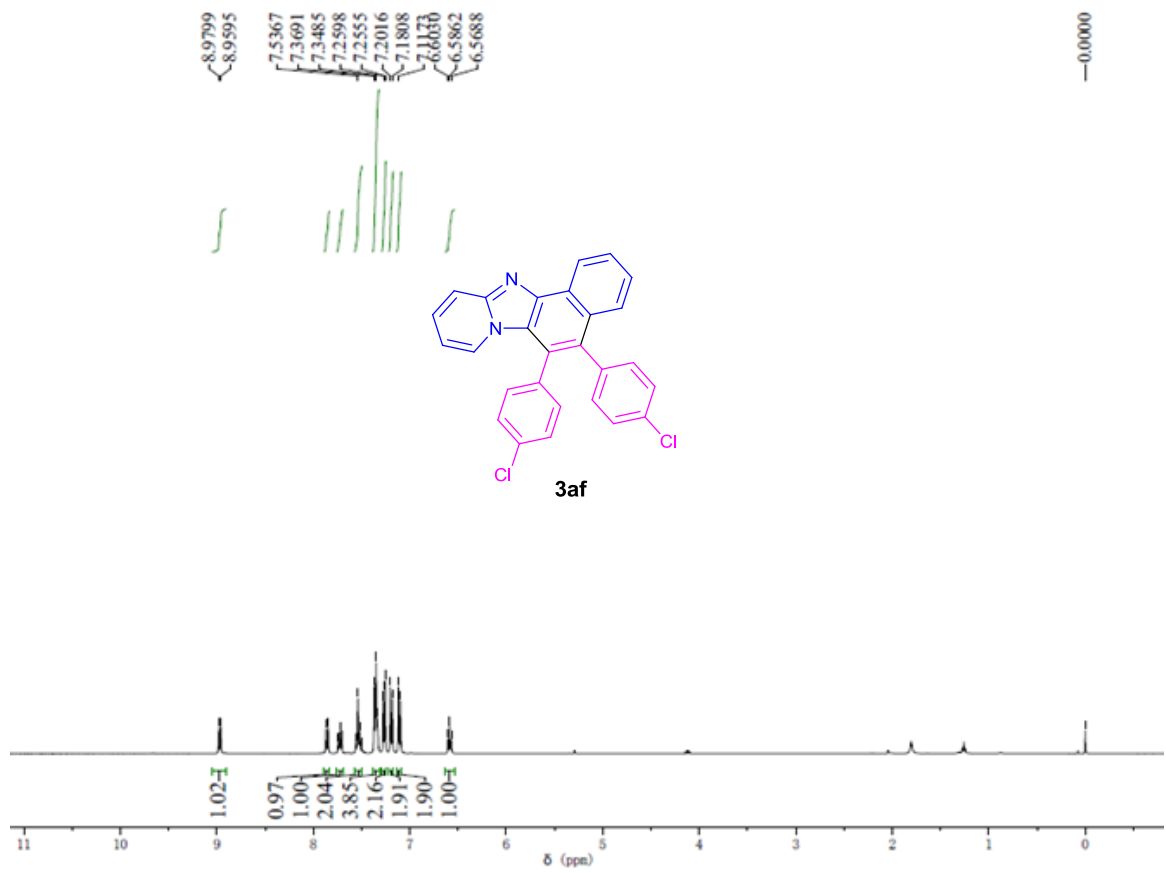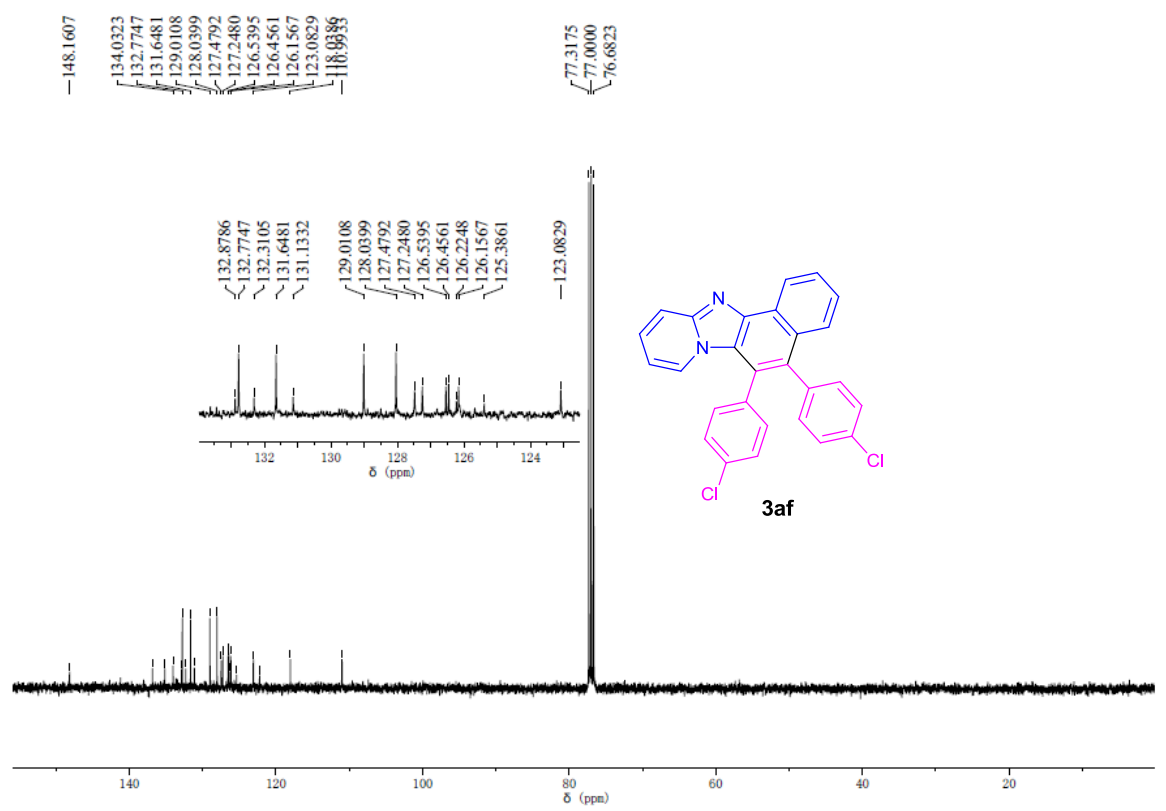



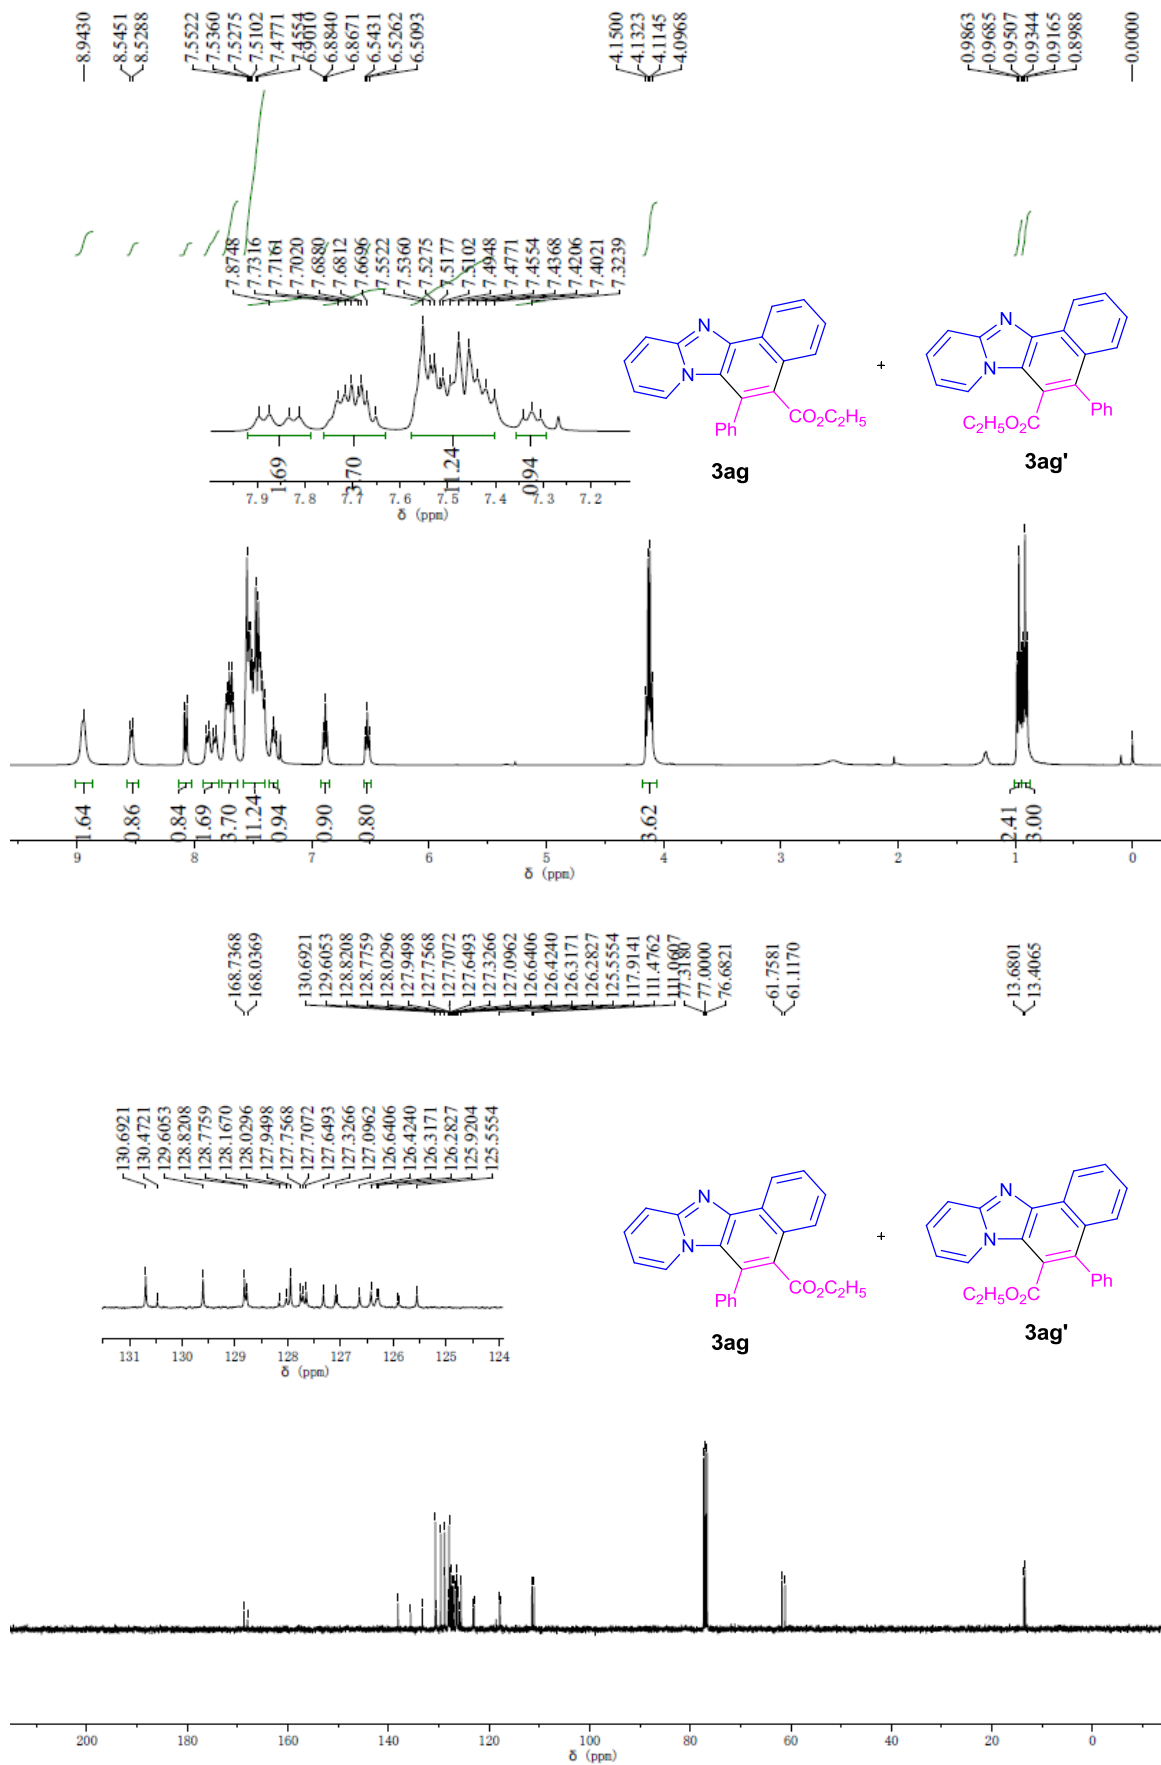

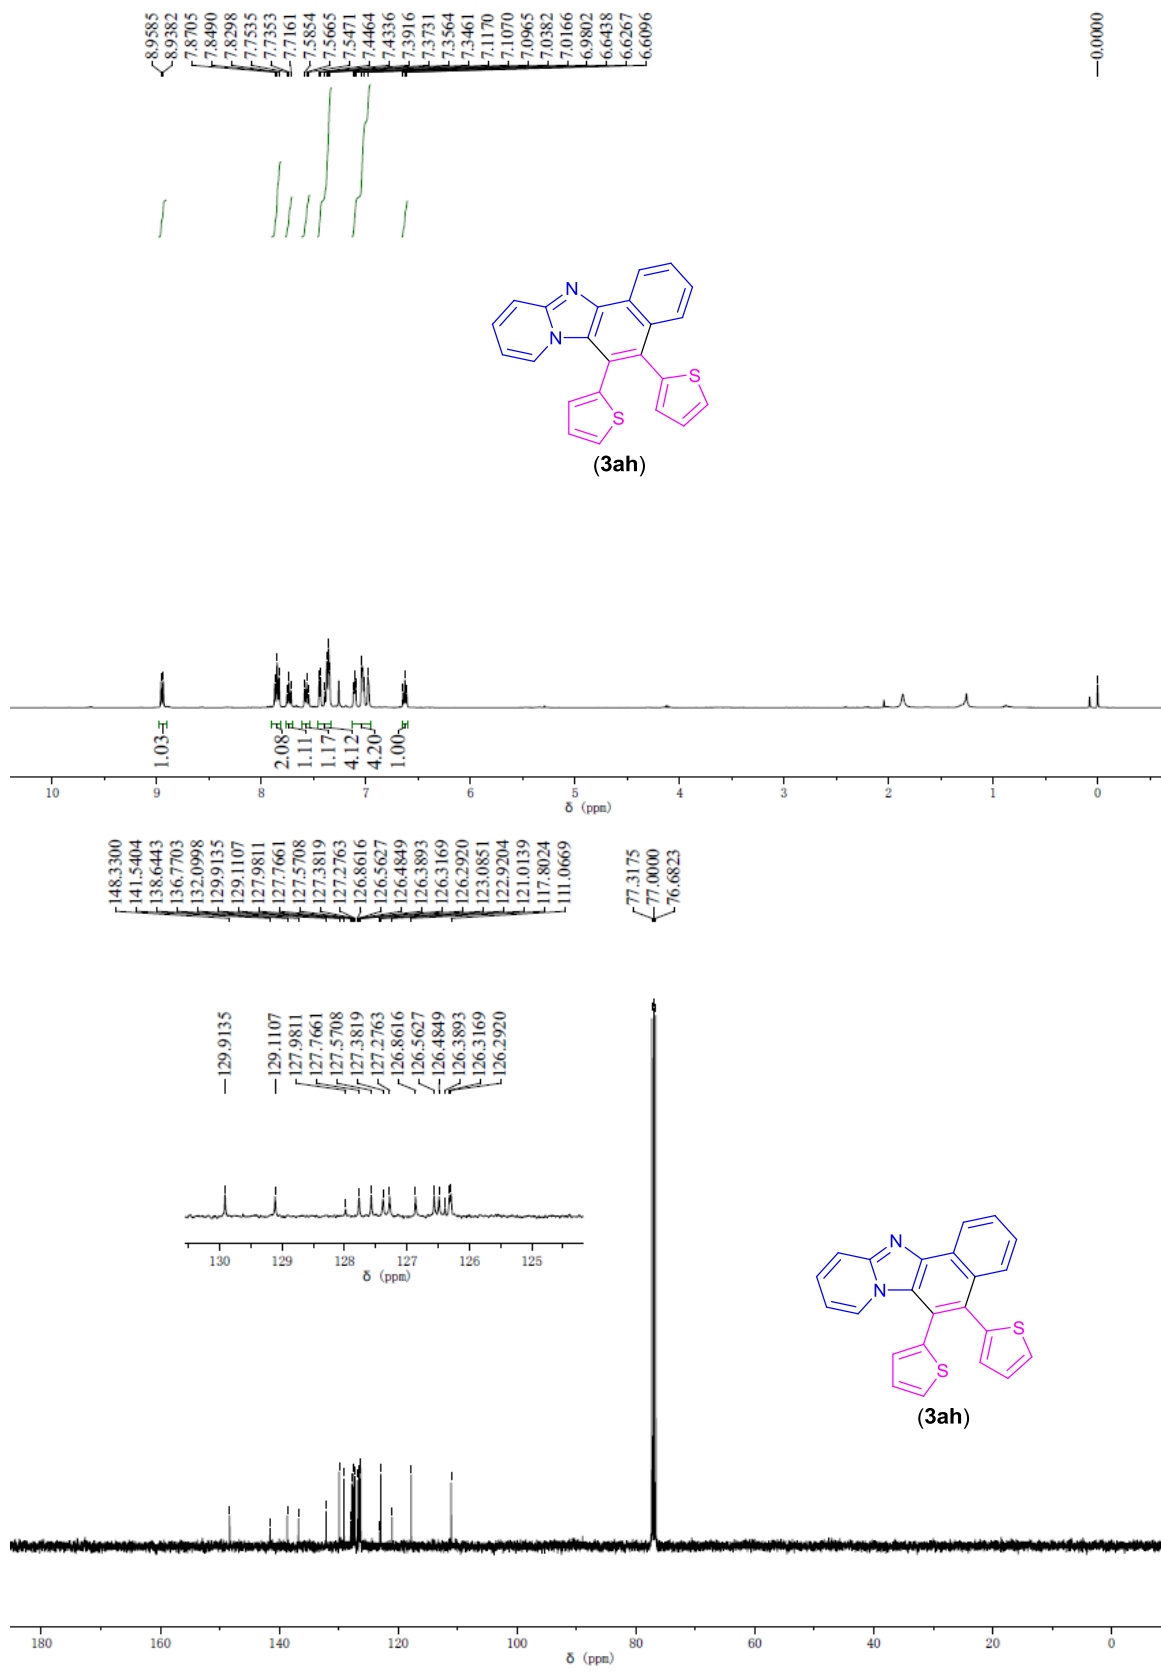

Supplement: c5ob00450k1.pdf [file c5ob00450k1.pdf]
